# Supplementary material for: Draft genome of the honey bee ectoparasitic mite, Tropilaelaps mercedesae, is shaped by the parasitic life history
Source: PubMed Central journal article supplement (PMC5467014; doi:10.1093/gigascience/gix008), 2017-02-22

1 **Draft genome of the honey bee ectoparasitic mite, *Tropilaelaps mercedesae*, is shaped by the**  
2 **parasitic life history**

33  
44  
55  
65 Xiaofeng Dong<sup>1</sup>, Stuart D Armstrong<sup>2</sup>, Dong Xia<sup>2</sup>, Benjamin L. Makepeace<sup>2</sup>, Alistair C. Darby<sup>3</sup>, and  
76 Tatsuhiko Kadowaki<sup>1\*</sup>

87  
97  
108  
119 <sup>1</sup>Department of Biological Sciences, Xi'an Jiaotong-Liverpool University, 111 Ren'ai Road, Suzhou  
120 Dushu Lake Higher Education Town, Jiangsu Province 215123, China

141 <sup>2</sup>Institute of Infection & Global Health, University of Liverpool, Liverpool L3 5RF, United Kingdom

162 <sup>3</sup>Institute of Integrative Biology, University of Liverpool, Liverpool L69 7ZB, United Kingdom

173  
184  
194 Corresponding author:

205 Tatsuhiko Kadowaki

216 Department of Biological Sciences, Xi'an Jiaotong-Liverpool University

217 111 Ren'ai Road, Suzhou Dushu Lake Higher Education Town

248 Jiangsu Province 215123, China

259 TEL: 86 512 88161659, FAX: 86 512 88161899

270 E-mail: [Tatsuhiko.Kadowaki@xjtlu.edu.cn](mailto:Tatsuhiko.Kadowaki@xjtlu.edu.cn)

281  
292 E-mail addresses of authors:

313 Xiaofeng Dong: [Xiaofeng.dong12@student.xjtlu.edu.cn](mailto:Xiaofeng.dong12@student.xjtlu.edu.cn)

324 Stuart D Armstrong: [sarmstro@liverpool.ac.uk](mailto:sarmstro@liverpool.ac.uk)

345 Dong Xia: [dongxia@liverpool.ac.uk](mailto:dongxia@liverpool.ac.uk)

326 Benjamin L. Makepeace: [blm1@liverpool.ac.uk](mailto:blm1@liverpool.ac.uk)

377 Alistair C. Darby: [Alistair.Darby@liverpool.ac.uk](mailto:Alistair.Darby@liverpool.ac.uk)

31 **Abstract**

32 **Background**

33 The number of managed honey bee colonies has considerably decreased in many developed  
34 countries in recent years and ectoparasitic mites are considered as major threats to honey bee  
35 colonies and health. However, their general biology remains poorly understood.

36 **Results**

37 We sequenced the genome of *Tropilaelaps mercedesae*, the prevalent ectoparasitic mite infesting  
38 honey bees in Asia and predicted 15,190 protein-coding genes which were well supported by the  
39 mite transcriptomes and proteomic data. Although amino acid substitutions have been accelerated  
40 within the conserved core genes of two mites, *T. mercedesae* and *Metaseiulus occidentalis*, *T.*  
41 *mercedesae* has undergone the least gene family expansion and contraction between the seven  
42 arthropods we tested. The number of sensory system genes has been dramatically reduced but *T.*  
43 *mercedesae* contains all gene sets required to detoxify xenobiotics. *T. mercedesae* is closely  
44 associated with a symbiotic bacterium (*Rickettsiella grylli*-like) and DWV, the most prevalent honey  
45 bee virus.

46 **Conclusions**

47 *T. mercedesae* has a very specialized life history and habitat as the ectoparasitic mite strictly depends  
48 on the honey bee inside a stable colony. Thus, comparison of the genome and transcriptome  
49 sequences with those of a tick and free-living mites has revealed the specific features of the genome  
50 shaped by interaction with the honey bee and colony environment. Genome and transcriptome  
51 sequences of *T. mercedesae*, as well as *Varroa destructor* (another globally prevalent ectoparasitic  
52 mite of honey bee), not only provide insights into the mite biology, but may also help to develop  
53 measures to control the most serious pests of the honey bee.

54  
55 **Keywords:** Honey bee decline, Honey bee ectoparasitic mite, Genome, Transcriptome, Proteome,  
56 Comparative genomics, Host-Parasite interaction

## 58 **Background**

59 The number of managed honey bee (*Apis mellifera*) colonies has considerably decreased in many  
60 developed countries in recent years [1]. Although there are many potential causes for the decline,  
61 pathogens and parasites of the honey bee, particularly ectoparasitic mites, are considered major  
62 threats to honey bee colonies and health [2]. *Varroa destructor* is present globally and causes  
63 abnormal brood development and brood death in honey bees, and is also responsible for the spread of  
64 honey bee pathogens and parasites [3]. *Tropilaelaps mercedesae* (small honey bee mite, Fig. 1) is  
65 another honey bee ectoparasitic mite which is prevalent in most Asian countries [4]. Thus, these two  
66 mite species usually co-exist in a honey bee colony in Asia. Compared to *V. destructor*, *T.*  
67 *mercedesae* produces a higher number of offspring and has almost no phoretic period on adult honey  
68 bees, and thus builds up relatively higher population levels within colonies [4, 5]. Similar to *V.*  
69 *destructor*, *T. mercedesae* can vector Deformed Wing Virus (DWV) [6, 7] and influence host  
70 immune responses [8]. Furthermore, it has been recently shown that *T. mercedesae* infestation  
71 reduces the longevity and emergence weight of honey bees, and enhances the DWV levels and  
72 associated symptoms [9]. The original host of *T. mercedesae* is the giant Asian honey bee, *Apis*  
73 *dorsata*, and like *V. destructor*, it shifted hosts to infest *A. mellifera* when these colonies were  
74 brought into Asia [4]. Although *T. mercedesae* is currently restricted to Asia, it has the potential to  
75 spread and establish all over the world due to the global trade of honey bees. This is exactly what  
76 happened with *V. destructor* [10].

77 *T. mercedesae* and *V. destructor* are major threats to the current apiculture industry; however, we  
78 still do not completely understand their sensory system, development, sex  
79 determination/differentiation, reproduction, and the capability to acquire miticide (for example,  
80 tau-fluvalinate and flumethrin) resistance. Genomic features of *V. destructor* were briefly reported  
81 before and the associated bacteria and viruses were identified [11]. In this study, we sequenced the  
82 genome and transcriptomes of *T. mercedesae*, supplemented by proteomic data, to provide insights  
83 into the above aspects and understand how the mite has evolved under a very specialized  
84 environment - inside the honey bee colony by depending on the honey bee as the sole host. We will  
85 discuss how *T. mercedesae* may have adapted to its host and environment by shaping its genome.

## 86 **Results and Discussion**

### 87 **Genome assembly, repeated sequences, and gene annotation**

88 Dual indexed paired-end DNA libraries were prepared from a single adult male and female *T.*  
89 *mercedesae* for whole-genome sequencing using the Illumina shotgun platform (Supplementary  
90 Table 1). The “cleaned” reads from the male mite were then re-assembled into 34,155 scaffolds with  
91 an N50 of 28,807 bp representing ~353 Mb of genomic sequence, from which we predicted 15,190  
92 protein-coding genes (Table 1 and Supplementary Table 2). We found that 95.33% of the “cleaned  
93 reads” could be mapped back to this assembly and 244 (98.4%) out of the 248 Conserved Eukaryotic  
94 Genes [12] as well as 83% of 2,675 arthropod BUSCOs [13] were annotated from the assembled  
95 genome (Supplementary Table 3). These are comparable to those reported for nine other arachnids  
96 (Table 1 and Supplementary Table 3). Proteomic characterization of the adult males and females  
97 yielded 124,798 mass spectra in total and 60,463 were assigned to the peptides of annotated proteins  
98 above (Supplementary file 1). With k-mer statistics [14], the size of the *T. mercedesae* genome was  
99

100 estimated to be 660 Mb with a peak k-mer depth of ~60X, and thus approximately 50% of the  
101 genome DNA was inferred to comprise repetitive sequences (Supplementary Fig. 1). Repetitive  
102 sequences such as DNA transposons, retrotransposons including LINE (Long Interspersed Nuclear  
103 Element), SINE (Short Interspersed Nuclear Element), and LTR (Long Terminal Repeat) as well as  
104 satellite DNA represent only 7 % of the assembly. But they occupied 48.57% of total clean reads  
105 (Supplementary Table 4) and the majority of them were found in the high-coverage regions of the  
106 genome (Supplementary Table 5), suggesting that repetitive sequences have been collapsed in the  
107 genome assembly. We thus concluded that the qualities of draft genome sequence and protein-coding  
108 gene set were sufficiently robust for further characterization of *T. mercedesae* genome and  
109 transcriptome.

110 Flow cytometric measurement of *T. mercedesae* nuclear DNA content together with the k-mer  
111 statistics demonstrated that the male mite assumed to be haploid with ~660 Mb (1C) DNA. The  
112 female mite was twice that size and assumed to be diploid at 1,287 Mb (2C) DNA (Supplementary  
113 Fig. 2). Thus, *T. mercedesae* may use haplodiploidy for sex determination, and the genome size of *T.*  
114 *mercedesae* is the largest among those of mites whose genomes have been sequenced (*V. destructor*,  
115 *Metaseiulus occidentalis*, *Tetranychus urticae*, *Sarcoptes scabiei*, and *Dermatophagoides farinae*)  
116 [15-17, 11, 18] but smaller than those of ticks (for example, *Ixodes scapularis* [19]). As expected  
117 from the largest genome size among the sequenced mites, gene density is low in the *T. mercedesae*  
118 genome (with larger intergenic regions); reminiscent of the large velvet spider (*Stegodyphus*  
119 *mimosarum*) and the black-legged tick (*I. scapularis*) genomes (Supplementary Fig. 3). Although the  
120 exon size range was comparable in all tested genomes (small honey bee mite, predatory mite,  
121 black-legged tick, velvet spider, spider mite, fruit fly, and honey bee) (Supplementary Fig. 4A), the  
122 average size of introns in *T. mercedesae* is larger than that in two other mites and insects that were  
123 analyzed (Supplementary Fig. 4B). We also successfully annotated genes encoding rRNA, tRNA,  
124 snRNA, and miRNA in the *T. mercedesae* genome (Supplementary Table 6), obtained RNA-seq data  
125 from *T. mercedesae* adult males and females as well as nymphs, and assembled the reads to aid  
126 protein-coding gene annotation and to compare their gene expression profiles.

### 127 **Comparative genomics**

128 The protein-coding genes of *T. mercedesae* were compared with those of six other arthropods  
129 (mentioned above) and a nematode. Phylogenetic trees constructed using 926 highly conserved 1:1  
130 orthologs implementing both maximum likelihood and Bayesian methods demonstrated that the  
131 *Tropilaelaps* mite and the predatory mite cluster together; however, the spider mite forms an  
132 outgroup to two other mites, the black-legged tick, and the velvet spider (Fig. 2A). This is consistent  
133 with previous reports that the subclass Acari is diphyletic, with the superorders Acariformes (spider  
134 mite) and Parasitiformes (*Tropilaelaps* mite and predatory mite) being distantly related [20, 21].  
135 Since above three mite species have similar body structure and morphology, this could be an  
136 example of convergent evolution [22]. The molecular species phylogenetic tree also indicates the  
137 variable evolutionary rates in gene sequence; with the branch of *T. mercedesae* and *M. occidentalis*  
138 exhibiting the fastest rate among arthropods we tested (Fig. 2A).

139 OrthoMCL classified the predicted proteins of *T. mercedesae* together with proteins from six  
140 other arthropods and outgroup into a total of 15,506 orthology clusters. As expected from the  
141 phylogenetic tree, the *Tropilaelaps* mite shares the most orthology clusters (1,215) with the

142 predatory mite (Fig. 2B). Among these orthology clusters, GO terms related with 'Structural  
143 constituent of cuticle', 'Regulation of DNA methylation', and 'Xenobiotic metabolic process' are  
144 enriched (Supplementary Table 7). We found 119 orthology clusters consisting of 332  
145 species-specific genes and 5,846 unclustered genes which were not classified to any orthology  
146 clusters by orthoMCL are only present in *T. mercedesae* but not in the other reference genomes  
147 analyzed (Fig. 2A and B). These unclustered genes may include both *T. mercedesae*-unique genes  
148 and paralogs which have extensively diverged from their orthologs so that their sequence similarity  
149 was not detected by orthoMCL. We found that 1,981 unclustered genes could be assigned with at  
150 least one GO term and among these lineage-specific genes, three GO terms, 'Structural constituent of  
151 cuticle', 'Nucleosome', and 'DNA bending complex' are highly enriched ( $FDR < 1.50 \times 10^{-4}$ )  
152 (Supplementary Table 8). *T. mercedesae* contains 117 members of the cuticle protein family [23], in  
153 which 53 are novel among the seven arthropods analyzed, suggesting that the mite's exoskeleton has  
154 rapidly evolved. Two other enriched GO terms could be involved in the epigenetic control of gene  
155 expression. Among 226 orthology clusters that are shared between *T. mercedesae*, *M. occidentalis*,  
156 and *I. scapularis*, GO terms related with 'Transporter activity' are highly enriched. We found that 135  
157 orthology clusters specifically shared between *T. mercedesae* and *I. scapularis* were enriched with  
158 GO terms related to 'Renal tubule development', perhaps to maintain a constant water level following  
159 the intake of a large volume of hemolymph or blood, respectively [24, 25] (Supplementary Table 9).

160 We used CAFE to infer gene family expansion and contraction in *T. mercedesae* together with  
161 six other arthropod species. We found that *T. mercedesae* has undergone the fewest gene family  
162 expansion/contraction events since divergence from the common ancestor of arthropods  
163 (Supplementary Fig. 5). This feature may fit to the specific life history of a mite parasitizing only the  
164 honey bee and living inside a colony with an enclosed, stable environment. However, there are some  
165 significantly expanded gene families ( $P$ -value  $< 0.001$ ) associated with zinc ion binding and peptide  
166 cross-linking. Meanwhile, one of the HSP70 gene families (Heat shock 70 kDa protein cognate 4)  
167 has significantly contracted in *T. mercedesae* (Supplementary Table 10), perhaps because the mite  
168 spends most of its time in the honey bee brood cell where the temperature is constantly around 35°C  
169 [26]. We analyzed 91 genes with  $d_N/d_S > 1.0$  in *T. mercedesae* using the one ratio model (null model)  
170 to test the significance, and found that four genes have evolved rapidly either due to relaxation or  
171 positive selection (Supplementary Table 11). Among them, Tm\_07523 encodes an  
172 endo- $\beta$ -N-acetylglucosaminidase-like protein, a chitinase, which could be involved in processing  
173 chitin specifically present in *T. mercedesae*.

### 174 **Sensory systems**

175 *T. mercedesae* has a very specific life history and habitat as a honey bee ectoparasitic mite. The mite  
176 depends only on the honey bee as the host and spends most of its life in the capped brood cell. Thus,  
177 they are likely to depend on the chemosensory rather than the visual system to seek out the fifth  
178 instar honey bee larva and the mating pair. Therefore, we annotated and analyzed genes associated  
179 with phototransduction and chemosensory systems in *T. mercedesae*.

180 We found that the homologs of *D. melanogaster* opsins, arrestin, TRPL, and INAD are absent in  
181 *T. mercedesae* (Supplementary Fig. 6). Since they are the major components for fruit fly  
182 photoreception, *T. mercedesae* appears to be blind, and this is consistent with the lack of eye  
183 structures. Nevertheless, the adult females immediately move out from a brood cell when the cap is

184 removed and exposed to light, suggesting that they may be able to respond to light. *T. mercedesae*  
185 has two *peropsin* genes, as do predatory mites [21] (Supplementary Fig. 7). Peropsin is a retinal  
186 photoisomerase that converts all-*trans*-retinal to 11-*cis*-retinal and may couple with a G-protein  
187 through the conserved 'NPXXY' motif at the seventh transmembrane domain [27]. The existence of  
188 this gene in the jumping spider, black-legged tick, and humans suggests that peropsin may have been  
189 lost specifically in insects. However, its function in vision or other pathways remains to be  
190 determined. Only one of two *peropsin* genes (Tm\_08036) appears to be expressed in the *T.*  
191 *mercedesae* transcriptome, and it was highly expressed in the female compared to the male  
192 (Supplementary Fig. 8). Female may use this peropsin to move out from the brood cell for  
193 reproduction. The other components in phototransduction are present in *T. mercedesae*, suggesting  
194 that they could be involved in other signaling pathways. In contrast to *T. mercedesae*, *M.*  
195 *occidentalis* was reported to contain more molecular components for light perception such as  
196 arrestins and INAD and exhibit genuine light-induced behaviors in the absence of eyes [21].  
197 Meanwhile, *I. scapularis* contains seven opsins, including orthologs of the insect long-wavelength  
198 sensitive visual opsins [19], demonstrating that the tick uses more visual cues for location of mates,  
199 hosts and oviposition sites than the mites above.

200 Insect gustatory receptors (GRs) are multifunctional proteins for the perception of taste, airborne  
201 molecules, and heat [28]; however, their functions in other arthropods have not been addressed. We  
202 found only five GRs in *T. mercedesae* (TmGRs) and their orthologs are absent in *D. melanogaster*  
203 (Fig. 3). *I. scapularis* has expanded the specific group of GRs [19], and five TmGRs cluster with the  
204 tick's GRs, suggesting that these are expansions specific to Acari. Because they share a common  
205 ancestor with the *D. melanogaster* sugar receptor, they could be involved in taste perception (Fig. 3).  
206 Among the five TmGRs, one gene (Tm\_15249) is likely to be a pseudogene due to internal stop  
207 codons in the open reading frame. Expression of only two TmGR genes (Tm\_03548 and Tm\_09509)  
208 was supported by RNA-seq data. Tm\_09509 mRNA is highly expressed in adult females and  
209 Tm\_03548 mRNA is only detected in males at low levels (Supplementary Fig. 9), suggesting that  
210 they may respond to different ligands.

211 Ionotropic receptors (IRs) belong to a large family of ligand-gated ion channels, which also  
212 include ionotropic glutamate receptors (iGluRs) with the major roles in synaptic transmission. IRs  
213 appear to represent protostome-specific ancient olfactory and gustatory receptors [29]. We annotated  
214 eight IR and 34 iGluR genes in the *T. mercedesae* genome. In the eight annotated *T. mercedesae* IR  
215 (TmIR) genes, Tm\_15231 and Tm\_15229 are orthologs of DmIR25a and DmIR93a, respectively  
216 (Supplementary Fig. 10), which are expressed in the olfactory sensory neurons of *D. melanogaster*  
217 antennae [30]. Furthermore, DmIR25a has been recently shown to be involved in fruit fly  
218 temperature sensation [31, 32]. The results of qRT-PCR revealed that these two genes are highly  
219 expressed in the first legs of *T. mercedesae* (Supplementary Fig. 11), which function as the major  
220 sensory organs similar to insect antennae [33]. Thus, these two TmIRs may represent the ancient  
221 receptors present in the common ancestor of arthropods. It appears that six other TmIRs have arisen  
222 specifically in a mite lineage (Supplementary Fig. 12).

223 Interestingly, there are no OR (olfactory receptor), OBP (odorant binding protein), and CSP  
224 (chemosensory protein) genes in the *T. mercedesae* genome (Table 2). Since OR and OBP genes are  
225 also absent in *M. occidentalis*, the black-legged tick, the centipede (*Strigamia maritima*), and the

226 water flea (*Daphnia pulex*), these appear to have evolved specifically in insect genomes as  
227 previously suggested [34]. Nevertheless, CSP genes must be ancient and may have been specifically  
228 lost in the two mite species. Despite of the potential importance of chemical communication for the  
229 life cycle [4], *T. mercedesae* has only four functional GRs and eight IRs, but no OR, OBP, or CSP  
230 genes. The presence of few orthologs between *T. mercedesae* and *D. melanogaster* suggests that the  
231 last common ancestor of arthropods had very few GRs and IRs. These chemoreceptors appear to  
232 have expanded in arthropod species in a lineage-specific manner [35]. In fact, Parasitiformes  
233 exposed to more variable environments, *i.e.*, *M. occidentalis* and *I. scapularis*, have more GR and IR  
234 genes than the more strictly host-dependent *T. mercedesae* (Table 2). Simplified behavioral patterns  
235 under a dark and stable environment inside a honey bee colony and capped brood cell may have  
236 reduced the number of tools in the sensory system in *T. mercedesae*.

### 237 **Detoxification system**

238 Three major groups of enzymes have important roles for metabolizing toxic xenobiotics in insects  
239 and the acquisition of insecticide resistance; cytochrome P450s (P450s), glutathione-S-transferases  
240 (GSTs), and carboxylesterases (CCEs) [36]. P450s and CCEs are also involved in the synthesis and  
241 degradation of ecdysteroids, juvenile hormones, pheromones, and neurotransmitters [37, 38].  
242 After the actions of P450s and CCEs followed by GSTs, the xenobiotics-derived polar compounds or  
243 conjugates can be transported out of the cell by ATP-binding cassette transporters (ABC transporters)  
244 [39]. In some cases, ABC transporters and others directly and efficiently transport xenobiotics out of  
245 the cell without enzymatic modifications to prevent the exertion of toxicity [39]. Since various  
246 natural and synthetic chemical compounds have been used to control honey bee mites, it is of  
247 considerable interest to understand how *T. mercedesae* may detoxify such miticides and develop  
248 resistance.

249 We manually annotated 56 *T. mercedesae* P450 (TmP450) genes in which 18 appeared to be  
250 pseudogenes. In fact, the expression of none of these genes was supported by RNA-seq data. Thus, *T.*  
251 *mercedesae* has only 38 apparently functional P450 genes similar to the human louse, *Pediculus*  
252 *humanus* [40], and the expression of 36 genes were confirmed by RNA-seq data (Supplementary  
253 Table 12). Similar to insect P450s, they are phylogenetically clustered into CYP2, CYP3, CYP4, and  
254 mitochondrial clans (Fig. 4). The classification was based on *D. melanogaster* P450s, but only three  
255 TmP450 genes (Tm11277, Tm11316, and Tm10252) have *D. melanogaster* P450 (DmP450)  
256 orthologs classified as CYP2 and mitochondrial clans (Fig. 4 and Table 3). Thus, only a few P450  
257 genes were present in the last common ancestor of arthropods and might be associated with the  
258 synthesis and degradation of hormones. In the two large CYP3 and CYP4 clans, DmP450s and the  
259 mite P450s are phylogenetically separated, suggesting that they have independently expanded after  
260 the split of the ancestors of mites and insects (Fig. 4). All of the TmP450 genes have orthologs in the  
261 *M. occidentalis* genome as recently reported [41], but *M. occidentalis* has 12 and 13 more genes than  
262 *T. mercedesae* in the CYP2 and CYP3 clans, respectively, by our analysis (Table 3). *T. mercedesae*  
263 appears to have lost the CYP3 clan members from the common ancestor of the Parasitiformes (Fig.  
264 4) as suggested by CAFE analysis (Supplementary Table 13). Some of the TmP450 genes are  
265 differentially expressed between nymph, adult male, and adult female (Supplementary Fig. 12 and  
266 Supplementary Table 14), suggesting that they would be involved in the synthesis and degradation of  
267 hormones to control molting and sex-specific specific phenotypes of *T. mercedesae*.

268 *T. mercedesae* has 15 GST genes (TmGST) in which eight appear to be pseudogenes without  
269 evidences of the mRNA expression in the transcriptomes. This leads to only seven functional  
270 TmGST genes with mRNA expression confirmed by RNA-seq data (Supplementary Table 15).  
271 According to the reference data sets (*D. melanogaster* and *T. urticae* GSTs), the phylogenetic  
272 analysis of TmGSTs revealed the presence of four subfamilies (delta, mu, omega, and kappa), and an  
273 unclassified TmGST gene (Supplementary Fig. 13). Members in the mu, delta, epsilon, omega, theta,  
274 and zeta GST subclasses have been reported to function in a wide range of detoxification [42].  
275 Epsilon, sigma, theta, and zeta subfamilies are absent in both *T. mercedesae* and *M. occidentalis* by  
276 our analysis in contrast to the recent report [41]; however, *I. scapularis* contains epsilon and zeta  
277 subfamilies and *T. urticae* has the theta subfamily (Supplementary Table 16). This suggests that these  
278 three subfamilies have been lost from the *T. mercedesae* and *M. occidentalis* genomes. The full  
279 length orthologs of the five TmGST pseudogenes (Tm\_05455, Tm\_09167, Tm\_15202, Tm\_15203,  
280 and Tm\_15206) are present in *M. occidentalis* (Supplementary Fig. 13), suggesting that the delta and  
281 mu GST subfamilies have undergone constriction in *T. mercedesae*.

282 Insect CCEs can be divided into 14 subfamilies (A to N) with three major groups based on the  
283 functions of dietary detoxification (A-C), hormone and pheromone degradation (D-H), and  
284 neurotransmitter degradation (I-N) [43]. We manually annotated 50 *T. mercedesae* CCE genes, in  
285 which eight appeared to be pseudogenes without mRNA expression (Supplementary Table 17). The  
286 number of functional CCE genes in *T. mercedesae* is thus comparable to that in *M. occidentalis* [41]  
287 (Supplementary Table 18). Intriguingly, there are no mite CCEs in the subfamilies AF, H, I, K, and  
288 N; however, a massive mite specific expansion is found in the subfamilies J and M by our analysis  
289 (Supplementary Fig. 14 and Supplementary Table 18). Only three TmCCE genes (Tm\_00126,  
290 Tm\_05721, and Tm\_08305) have *D. melanogaster* orthologs, suggesting that CCE genes have  
291 independently duplicated in insects and mites. The expression of some TmCCE genes is biased  
292 between the nymph, adult female, and adult male (Supplementary Table 19). Above results  
293 demonstrate that *T. mercedesae* contains P450s, GSTs, and CCEs although the number and  
294 composition of subfamilies are different from those of other arthropods. Some of these enzymes may  
295 engage in detoxifying miticides and other xenobiotics in *T. mercedesae*.

296 We annotated 54 ABC transporter genes in the *T. mercedesae* genome, and the expression of 47  
297 genes was confirmed by RNA-seq data (Supplementary Table 20). Similarly, *M. occidentalis*  
298 contains 57 ABC transporters that are comparable to those present in *D. melanogaster* (56 genes)  
299 (Supplementary Table 20). However, mite-specific expansion is found in the ABCC subfamily, and  
300 instead fruit fly-specific expansion is observed in the ABCG subfamily (Supplementary Fig. 15). The  
301 ABCC subfamily includes many vertebrate multidrug-resistance associated proteins (MRPs) that  
302 extrude drugs with broad specificity [39]; thus, the expanded ABCC subfamily members in *T.*  
303 *mercedesae* could be involved in conferring resistance against various miticides. In the fruit fly,  
304 expansion has been observed of the ABCG subfamily, which contains the transporters for the uptake  
305 of pigment precursors into the cells of the Malpighian tubules and developing compound eyes  
306 (Supplementary Fig. 15). Because these mites do not have eyes, fewer numbers of the ABCG  
307 transporters would be sufficient. The mites and fruit fly appear to have independently expanded  
308 ABCA subfamily members (Supplementary Fig. 15). These results suggest that most of the ABCA  
309 and ABCC transporters may carry out different functions in mites and fruit flies. Interestingly, two



310 transporters, Tm\_07059 and Tm\_14842, form an independent clade separated from eight previously  
311 known ABC transporter subfamilies. In cases where the mite ABC transporter genes show biased  
312 expression between female, male, and nymph, most of them are highly expressed in either male or  
313 nymph compared to female (Supplementary Table 21).

### 314 **Sex determination genes in *T. mercedesae***

315 Arthropods are known to use various strategies for sex determination [44]. In contrast to *T.*  
316 *mercedesae*, which is likely to use haplodiploidy, *M. occidentalis* employs parahaploidy, in which the  
317 functional elimination of paternal chromosomes occurs during early embryogenesis resulting in male  
318 development [45, 21]. To gain insight into the mechanism of sex determination of *T. mercedesae*, we  
319 manually annotated the candidate genes for sex determination in the *T. mercedesae* genome.  
320 Similarly to *M. occidentalis* [21], *T. mercedesae* does not contain upstream sex determination genes  
321 (*Sex-lethal* and *transformer*) but has the homologs of downstream sex determination genes,  
322 *transformer-2*, *dmrt* (doublesex and mab3 related transcription factor), and *intersex*. *T. mercedesae*  
323 has the most *dmrt* genes of the arthropods that we tested (Supplementary Table 22) and has two extra  
324 *dsx* genes compared to *M. occidentalis* (Supplementary Fig. 16). The Dmrt93B ortholog is present in  
325 *T. mercedesae* (Tm\_07872) but not in *M. occidentalis* (Supplementary Fig. 16), and all of the *dmrt*  
326 genes are highly expressed in the male (Supplementary Fig. 17). These results suggest that *T.*  
327 *mercedesae* and *M. occidentalis* may use a different set of genes for sex determination.

### 328 **Comparison of gene expression profiles between nymphs and adult males and females**

329 Comparison between adult male and female transcriptomes and proteomes revealed that  
330 histone-lysine-*N*-methyltransferase gene family and N-acetyltransferase *gcn5* gene family were  
331 highly expressed in the male compared to the female (Fig. 5, Supplementary file 1, and  
332 Supplementary Table 23), suggesting that the male mite may mostly depend on histone modifications  
333 for the epigenetic control of gene expression. This could be due to the ploidy compensation between  
334 males with haploid genomes and females with diploid genomes. At the protein level, males displayed  
335 overrepresentation of 26S proteasome subunits and a 17-beta-hydroxysteroid dehydrogenase (Fig. 5),  
336 which accords with the importance of the ubiquitin-proteasome system in sperm maturation [46] and  
337 a potential role for ecdysteroids in sexual maturation of *T. mercedesae* [47]. The female mite highly  
338 expresses the vitellogenin gene family and cathepsin L-like proteases (Fig. 5 and Supplementary  
339 Table 23). This is consistent with active oogenesis in female mites, since both vitellogenin protein  
340 and Nanos mRNA would be deposited in the oocyte; while cathepsin L proteases may have a critical  
341 role in yolk processing as in *C. elegans* [48]. The results of above transcriptome and proteome  
342 analyses are not identical but a concordant set of 74 and 13 genes are up-regulated in the male and  
343 females, respectively. Comparison between adult female and nymph transcriptomes demonstrated  
344 that 46 out of the 125 cuticle protein gene families, 13 out of 24 chitin binding domain-containing  
345 protein gene families, and nine out of 16 chitinase gene families are expressed at a higher level in  
346 nymphs than in adult females (Supplementary Table 24), indicating that chitin metabolism as well as  
347 exoskeleton formation by molting is stimulated in the nymph. The nymph also highly expresses 18  
348 out of 29 protocadherin/fat gene families and 18 out of 44 epidermal growth factor-related receptor  
349 gene families. These are likely to be involved in cell-cell adhesion and cell proliferation associated  
350 with the increase of cell number in nymph. Consistent with above results, GO analysis of genes  
351 highly expressed in nymphs compared to the adult females demonstrated that many GO terms related

352 to cuticle formation and appendage morphogenesis are enriched (Supplementary Table 25).

### 353 **Symbiotic bacteria and infecting virus**

354 Several bacteria have been shown to associate with mites and ticks [17, 49, 50]; however, bacteria  
355 associated with honey bee mites have not yet been fully investigated [11]. We thus attempted to  
356 identify any bacteria associated with *T. mercedesae* by filtering the bacteria-derived DNA contigs  
357 during the mite genome assembly. In the male and female GC%-coverage plots, some contigs were  
358 initially annotated as bacterial DNA in the major blue blob, and most of these were identified to  
359 contain *Wolbachia* sequences by BLASTN searches (Fig. 6). We confirmed that parts of *Wolbachia*  
360 genes are integrated into the mite genome by testing two genomic contigs using PCR with two sets  
361 of primers (one primer located in the mite gene, and the other in the *Wolbachia* gene)  
362 (Supplementary Fig. 18A and B). This phenomenon of nuclear *Wolbachia* transfers, or *nuwts*, has  
363 been observed widely in other arthropods and in nematodes [51], although to the best of our  
364 knowledge, this is the first report for a chelicerate. It suggests that *T. mercedesae* or the ancestor had  
365 *Wolbachia* as the endosymbiont in the past. Meanwhile, we extracted all reads mapped to the red  
366 blob (bacterial origin) in the female plot (Fig. 6) and re-assembled them into 96 contigs. We  
367 annotated 751 protein-coding genes from the 81 contigs and found that 667 of these show high  
368 similarity to those of *Rickettsiella grylli* with an average identity of 79%. The rest of the 84  
369 protein-coding genes showed similarity to 20 other bacteria species, such as *Diplorickettsia*  
370 *massiliensis* and *Legionella longbeachae*. This demonstrates that a close relative of *R. grylli*  
371 associates with female but not male *T. mercedesae*. *Rickettsiella* is an intracellular  
372 gamma-proteobacterium associated with a wide range of different arthropods without major  
373 pathogenicity to the host [52]. *Wolbachia* endosymbiont in the past may have been replaced by a  
374 species related to *R. grylli* in *T. mercedesae*. The potential effects on *T. mercedesae* as well as the  
375 potential for transmission to the honey bee remain to be determined. Since we did not find any DNA  
376 sequences of actinomycete species in our sequence reads, the two major ectoparasitic mites of honey  
377 bee (*V. destructor* and *T. mercedesae*) do not appear to share the same bacteria [11]. Nevertheless,  
378 both mites do not contain common arthropod gut bacteria, suggesting that they are not essential for  
379 the honey bee mites.

380 We also assembled DWV RNA in the adult male and female, as well as nymph, transcriptomes  
381 (Supplementary Table 26). This is consistent with previous reports [53, 6, 7]; however, our data  
382 expand the infected stages to include the adult males and nymphs. DWV sequence reads represented  
383 one third of the whole RNA-seq data, and these very high levels of DWV RNA were further  
384 confirmed by qRT-PCR (Supplementary Table 27). The proteomic analysis of females and males  
385 recovered many peptides derived from the capsid (structural) proteins, but very few peptides from  
386 the non-structural proteins of DWV, demonstrating that the majority of DWV associated with the  
387 mites exists as mature virions (Supplementary Fig. 19). Similar observations were also reported for *V.*  
388 *destructor* [54]. We assembled three full length DWV RNA genomes and found that they are  
389 phylogenetically clustered with type A DWV [55] (Fig. 7). Thus, *T. mercedesae* may spread the  
390 specific strain of DWV (type A in this study) to honey bees as suggested for *V. destructor* [56].  
391 Considering that *T. mercedesae* was unlikely to carry DWV when associated with the original host,  
392 *A. dorsata*, DWV infection could impose a negative impact on the mite. It will be crucial to  
393 understand the nature of interactions between honey bee, mite, and DWV to measure the impact of *T.*

394 *mercedesae* infestation on honey bee colonies. However, in contrast to *V. destructor*, we did not  
395 detect baculoviruses in either the genome and transcriptome sequences [11].  
396

## 397 **Conclusions**

398 *T. mercedesae* has a very specialized life history and habitat as an ectoparasitic mite strictly  
399 depending on honey bees in a colony with closed and stable environment. Thus, comparison of the  
400 genome and transcriptome sequences with those of a free-living mite and a tick has revealed the  
401 specific features of the genome shaped by interaction with the honey bee and colony environment.

402 Our key findings are the followings;

- 403 1) Amino acid substitutions have been accelerated within the conserved core genes of *T. mercedesae*  
404 and *M. occidentalis*
- 405 2) *T. mercedesae* has undergone the least gene family expansion and contraction between the seven  
406 arthropods we tested
- 407 3) The numbers of HSP70 family genes and sensory system genes are reduced
- 408 4) *T. mercedesae* may have evolved a specialized cuticle and water homeostasis mechanisms, as well  
409 as epigenetic control of gene expression for ploidy compensation between male and female
- 410 5) *T. mercedesae* contains all gene sets required to detoxify xenobiotics, enabling it to be miticide  
411 resistant
- 412 6) *T. mercedesae* is closely associated with a symbiotic bacterium (*Rickettsiella grylli*-like) and  
413 DWV, the most prevalent honey bee virus.

414  
415 Manipulation of symbiotic *R. grylli*-like bacteria in the female mites may give the opportunity to  
416 control *T. mercedesae* in the future. Our *T. mercedesae* datasets, alongside published *V. destructor*  
417 genome and transcriptome sequences, not only provide insights into mite biology, but may also help  
418 to develop measures to control the most serious pests of the honey bee.  
419

## 420 **Methods**

### 421 **Mite sample collection**

422 Based on the morphological and ethological characteristics [57], adult males and females as well as  
423 nymphs of *T. mercedesae* were identified and collected from a single honey bee colony for the flow  
424 cytometric analysis and Illumina sequencing (genome and transcriptome). Meanwhile, the adult  
425 females #2 sample (Supplementary Table 1) was collected from a different colony. Both colonies  
426 were obtained from a beekeeper in Jiangsu Province, China. The mites collected for genome  
427 sequencing and proteomic characterization were stored in acetone at 4°C until use. The mites used  
428 for RNA-seq were sorted at -80°C before the transport.

### 429 **Genome sequencing**

430 Before DNA extraction, the mite bodies were carefully washed twice with acetone to remove any  
431 non-target organisms that might adhere on the mite surface. Subsequently, a single male and a single  
432 female mite were air dried (15 min) and individually triturated in 180 µL of lysozyme buffer (1M  
433 Tris-HCl, 0.5M EDTA, 1.2% Triton X-100, and 0.02% lysozyme) with a tissuelyser II (Qiagen,  
434 Valencia, USA) using a 3 mm stainless steel bead at 25,000 motions/min for 30 sec. After incubating  
435 the samples at 37 °C for 30 min, total DNA was extracted from each of the triturated samples with  
60

436 DNeasy Blood and Tissue kit (Qiagen) by following the manufacturer's spin-column protocol for  
437 animal tissue. To maximize the yield of DNA extraction, two successive elution steps, each with 50  
438 µl elution buffer, were performed. The DNA concentrations were determined by spectrophotometry,  
439 a sensitive and commonly used fluorescent dye assay (Qubit® dsdna BR assay, Life Technologies  
440 Europe, Naerum, Denmark) according to the manufacturer's instructions. Two paired-end Illumina  
441 DNA libraries were constructed with the male and female total genomic DNA samples (30 ng each)  
442 using a Nextera DNA sample preparation kit (Illumina, Great Chesterford, United Kingdom). The  
443 DNA libraries were then quality controlled and sequenced with Illumina Hiseq 2500 system using  
444 two individual lanes in the Centre for Genomic Research at the University of Liverpool. The raw  
445 fastq files were trimmed to remove Illumina adapter sequences using Cutadapt (v1.2.1) [58]. The  
446 option “-O 3” was set, so the 3' end of any reads which matched the adapter sequence over at least 3  
447 bp was trimmed off. The reads were further trimmed to remove low quality bases, using Sickle  
448 (v1.200) [59] with a minimum window quality score of 20. After trimming, reads shorter than 10 bp  
449 were removed.

### 450 **Transcriptome sequencing**

451 Male, female and nymph mites were shipped to BGI-Shenzhen with dry ice for total RNA extraction,  
452 polyA<sup>+</sup> RNA enrichment, cDNA library preparation, and Illumina Hiseq 2000/4000 sequencing.  
453 Total RNA (Supplementary Table 1) was extracted from a pool of 20~30 mites using Trizol reagent  
454 (Qiagen) and treated with DNase I (Qiagen). Next, polyA<sup>+</sup>RNA was isolated by magnetic beads with  
455 oligo (dT) and digested to short fragments by mixing with the fragmentation buffer, and then the  
456 cDNA was synthesized. The short DNA fragments were purified and resolved with EB buffer for  
457 end reparation and single nucleotide A (adenine) addition followed by ligation with adapters. DNA  
458 fragments suitable for sequencing were then selected for the PCR amplification. After QC steps,  
459 Illumina Hiseq 2000 system was used to sequence the libraries of adult males #1 (in two lanes), adult  
460 females #1 (in two lanes), nymphs #1 (in two lanes) and adult females #2 (in a single lane), whereas  
461 adult males #2 and nymphs #2 were sequenced with Illumina Hiseq 4000 system in a single lane.  
462 Raw reads were trimmed and filtered by internal tools of BGI-Shenzhen.

### 463 **Estimation of genome size and ploidy of *T. mercedesae***

464 Nuclear DNA contents of *T. mercedesae* males and females were estimated by a method of  
465 propidium iodide staining followed by flow cytometry [60]. Nuclei were isolated from ten *T.*  
466 *mercedesae* adult males and females, the heads of ten *D. melanogaster* females (1C = 175Mb) [61]  
467 and the brain of a honey bee worker (1C = 262 Mb) [62] by homogenizing each sample with 1 mL of  
468 a cold Galbraith buffer (30 mM sodium citrate, 18 mM MOPS (3-morpholinopropanesulfonic acid),  
469 21 mM MgCl<sub>2</sub>, 0.1% Triton X-100, 1 mg/L RNase A) using a loose pestle. The cellular debris were  
470 removed by filtering through 20 µm nylon mesh. Stained nuclei from adult male and female mites  
471 were independently analyzed with two reference standards using a BD FACS flow cytometer (BD  
472 Biosciences, San Jose, CA). Nuclear genome size was then calculated according to the following  
473 formula: Sample nuclear DNA content = (Mean peak of sample/Mean peak of reference standard) ×  
474 nuclear DNA content of reference standard. We estimated the genome size by analyzing the  
475 frequency of *k*-mers counted by Jellyfish [63] with the following formula [64]: Estimated genome  
476 size (bp) = total number of *k*-mer/the maximal frequency. The ploidy is the ratio of nuclear DNA  
477 content to genome size.

## 478 **De novo assembly of genomic DNA**

479 Prior to assembly, we discarded all male and female sequencing reads aligned to honey bee genome  
480 sequence by Bowtie 2 (v2.2.1) [65]. The unaligned male and female reads were then extracted by  
481 bam2fastq (v1.1.0) and assembled individually by Velvet v1.2.07 [66] into preliminary contigs with  
482 their best k-mers and parameters of ‘-min\_contig\_lgth=200 and -ins\_length 1105 (male)/939  
483 (female)’. DNA sequences derived from non-targets such as bacteria and mitochondria were filtered  
484 out based on the preliminary assemblies of male and female genome sequences using a GC-coverage  
485 (proportion of GC bases and node coverage) plot-based method by blobtools (v0.9.19) [67] (Fig. 6),  
486 resulting in total 400,520,654 and 453,725,764 “clean reads” for male and female mite, respectively.  
487 The male “clean reads” were re-assembled and optimized up to scaffold level using the  
488 VelvetOptimiser (v2.2.5) with the velvet parameters set to ‘-min\_contig\_lgth 200 and -ins\_length  
489 1105’.

## 490 **Genome annotation**

491 To find, classify and mask repeated sequences in the assembled male genome, a *de novo* repeat  
492 library was first built using Repeatmodeler (A. F. A. Smit and P. Green, unpublished) with  
493 ‘-database’ function followed by Repeatmasker (A. F. A. Smit and P. Green, unpublished) using  
494 default setting for *de novo* repeated sequences prediction. Then, a homology-based prediction of  
495 repeated sequences in the genome was achieved using Repeatmasker with default setting to search  
496 against RepBase repeat library issued on January 13, 2014. For non-interspersed repeated sequences,  
497 we ran Repeatmasker with the ‘-noint’ option, which is specific for simple repeats, micro satellites,  
498 and low-complexity repeats.

499 RNA-seq reads obtained from all samples were aligned to the masked genomic scaffolds to  
500 determine the exon-intron junctions using Tophat (v2.0.11) with default setting [68]. Cufflinks (v0.8.2)  
501 [69] used the spliced alignments with default setting to reconstruct 44,614 transcripts from which  
502 12,298 transcripts with intact coding sequences were selected by a Perl script developed by Liu et al.  
503 [70]. Thee *ab initio* gene prediction programs, including Augustus (v3.0.3) [71], SNAP (v2013-11-29)  
504 [72] and Genemark (v2.3e) [73] were used for *de novo* gene predictions. Augustus and SNAP were  
505 trained based on the selected intact coding sequences with default setting, whereas GeneMark [73]  
506 was self-trained with ‘--BP OFF’ option. We ran Augustus, SNAP, and Genemark with default  
507 setting, and predicted 32,561, 67,258, and 79,928 gene models in the masked genomic scaffolds,  
508 respectively (Supplementary Table 2).

509 We also generated an integrated gene sets using MAKER v2.31.4 [74] pipeline. The MAKER  
510 pipeline runs Augustus, SNAP and Genemark to produce *de novo* gene predictions, and integrates  
511 them with the evidence based predictions. They were generated by aligning all Cufflinks assembled  
512 transcript sequences and the invertebrate RefSeq protein sequences (downloaded on May 17, 2014  
513 from NCBI) to the masked male mite genome by BLASTN and BLASTX, respectively. The  
514 MAKER pipeline was run with ‘-RM\_off’ option to turn all repeat masking options off, and all  
515 parameters in control files were left with their default settings.

516 Genes identified by *de novo* prediction, which did not overlap with any genes in the integrated  
517 gene sets, were also added to the final gene set if they showed significant hits (BLASTP E-value <  
518 1e-5) to SwissProt proteins or could be annotated by Interproscan (v4.8) [75] with InterPro  
519 superfamily database (v43.1) using ‘-appl superfamily -nocrc’ options.

## 520 **ncRNA annotation**

521 In this analysis, we annotated four types of ncRNA: transfer RNA (tRNA), ribosomal RNA (rRNA),  
522 microRNA, and small nuclear RNA (snRNA). Genes encoding tRNA were predicted by tRNAScan-SE  
523 (v1.3.1) [76] with eukaryote parameters, and rRNA genes were identified by aligning the rRNA  
524 template sequences from invertebrates (database: SILVA 119) to the *T. mercedesae* genomic DNA  
525 using BLASTN with an E-value cutoff of 1e-5. Genes encoding miRNA and snRNA were inferred  
526 by the Infernal software (v1.1.1) [77] using release 12 of the Rfam database with ‘--cut\_tc’ option.

## 527 **Protein functional annotation**

528 We performed the initial and principal domain annotation with the Pfam database (release 27) using  
529 the hmmscan in HMMER v3.1b1 with default settings. Additional domains (superfamily, Gene3d,  
530 Tigrfams, Smart, Prosite, and Prints domain models) and domain/motif based GO term were  
531 assigned using InterProScan search against InterPro database (v43.1) with ‘-cli -nocrc -goterms  
532 -iprlookup’ options.

533 We used Blast2GO pipeline (v2.5) [78] to further annotate proteins by Gene Ontology (GO)  
534 terms. In the first step, we searched the nr database with BLASTP using a total of 15,190 protein  
535 sequences as queries. The E-value cutoff was set at 1e-6 and the best 20 hits were collected for  
536 annotation. Based on the BLAST results, Blast2GO pipeline then predicted the functions of proteins  
537 to assign GO terms, and merged the InterProScan deduced domain/motif based GO terms into these  
538 BLAST based annotations.

539 The metabolic pathway was constructed based on the KAAS (KEGG Automatic Annotation  
540 Server) online server [79] using the recommended eukaryote sets, all other available insects, and *I.*  
541 *scapularis*. The pathways in which each gene product might be involved were derived from the best  
542 KO hit with BBH (bi-directional best hit) method.

## 543 **GO enrichment**

544 We performed the GO enrichment analyses of gene sets with Fisher's exact test embedded in the  
545 Blast2GO desktop version (v2.8). If not specifically stated, the *P*-values were corrected according to  
546 the critical FDR. The enrichments were tested by comparing the GO terms with the pooled set of GO  
547 terms of all *T. mercedesae* proteins.

## 548 **Protein data sets of reference genomes**

549 Protein data sets of the following arthropod genomes were used as references: *D. melanogaster* (fruit  
550 fly; GOS release: 6.03) [80], *A. mellifera* (honey bee; GOS release: 3.2) [62], *T. urticae* (spider mite;  
551 GOS release: 20140320) [15], *Stegodyphus mimosarum* (velvet spider; GOS release: 1.0) [81], *I.*  
552 *scapularis* (black-legged tick; GOS release: 1.4; GenBank project accession: ABB010000000) [19],  
553 *M. occidentalis* (predatory mite; GOS release: 1.0) [21]. *Caenorhabditis elegans* (nematode; GOS  
554 release: WS239) [82] was used as the outgroup. Domain, GO, and KEGG annotation of proteins in  
555 the reference species (if required) was conducted using the same methods as those used for *T.*  
556 *mercedesae*.

## 557 **Gene family phylogenetics**

558 We first aligned orthologous protein sequences with Mafft (v7.012b) [83] or Kalign (v2.0) [84], and  
559 then used Gblocks (v0.91b) [85] to automatically eliminate the divergent regions or gaps prior to  
560 phylogenetic analysis. However, we manually trimmed the aligned sequences for big gene sets. The  
561 best substitution models of amino acid substitution were determined for the alignments by Prottest

562 (v3.4) with parameters set to “-all-matrices, -all-distributions, -AIC” [86]. Then, phylogenetic trees  
563 were constructed using maximum likelihood methods (Phyml, v3.1) [87] or Bayesian methods  
564 (MrBayes, v3.2.3) [88]. In addition, a neighbor-joining method was also used for building the  
565 distance-based trees using MEGA (v6.06) [89].

### 566 **Species tree phylogenetics**

567 Since the rapid evolution of acariform mites may challenge phylogenetic analyses due to long-branch  
568 attraction [90], we used a very strict E-value (1e-50) when performing a reciprocal BLASTP to gate  
569 out the most variant orthologous genes across all genomes tested. The reciprocal BLAST search  
570 resulted in identification of a total of 926 highly conserved one-to-one orthologs in all eight genomes.  
571 Each of these orthologous groups was aligned using Mafft in “-auto” option. These alignments were  
572 trimmed by Gblocks and concatenated into the unique protein superalignments. ProtTest determined  
573 the best-fit substitution model of LG with invariant sites (0.109) and gamma (0.913) distributed rates  
574 using parameters as above before conducting the phylogenetic analysis with Phyml.

### 575 **Analysis of gene family expansion and positive selection**

576 Orthologous gene families between *T. mercedesae* and six reference arthropods were defined based  
577 on OrthoMCL (v1.4) [91] clustering. We used CAFE (v3.1) [92] to infer the gene family expansion  
578 and contraction in *T. mercedesae* against all reference arthropods or against Parasitiformes (*I.*  
579 *scapularis* and *M. occidentalis*). The ultrametric species tree used in CAFE analyses was created as  
580 described in Gene family phylogenetics section.

581 We also calculated  $\omega$  (dN/dS) ratios for 1,865 one-to-one orthologs defined by OrthoMCL using  
582 codeml in the PAML package with the free-ratio model. Branches with  $\omega > 1$  are considered under  
583 positive selection. The null model used for branch test was the one-ratio model, where  $\omega$  was the  
584 same for all branches. The null model used for branch test was the one-ratio model (nssites = 0;  
585 model = 0) where  $\omega$  was the same for all branches. Kappa and omega values were automatically  
586 estimated from the data, when clock was set to be entirely free to change among branches. *P*-value  
587 was determined twice using the log-likelihood difference between the two models compared to  $\chi^2$   
588 distribution with the difference in number of parameters between one-ratio and free-ratio models. To  
589 estimate significance with the *P*-value, likelihood-ratio test (LRT) was used to compare lnL values for  
590 each model and test if they are significantly different. The differences in log-likelihood values  
591 between two models were compared to chi-square distribution with degree of freedom equal to the  
592 difference in the number of parameters for two models. Measurement of dS was assessed for  
593 substitution saturation, and only dS values < 3.0 were maintained in the analysis for positive  
594 selection. Genes with high ( $\omega > 10$ ) were also discarded.

### 595 **De novo transcriptome assembly and estimation of the transcript abundance**

596 All RNA-seq reads mapped to the honey bee transcripts were filtered out first. Then, all RNA-seq  
597 samples in Supplementary Table 1 were individually *de novo* assembled by Trinity (v20131110) [93]  
598 with default setting. We used a RSEM [94] software package to estimate the expression levels  
599 (abundance) of *de novo* assembled transcripts and isoforms with default setting.

### 600 **Analysis of RNA-seq data**

601 After further removing the RNA-seq reads corresponding to DWV sequence, we aligned the cleaned  
602 reads to the assembled *T. mercedesae* genome using Tophat with default setting. Then, Htseq-count  
603 in the Htseq Python package (v0.6.1) [95] was used to obtain raw read counts, with the default

604 union-counting mode and option ‘-a’ to specify the minimum score for the alignment quality. The  
605 raw read count for each sample was then subject to further differential expression analysis using the  
606 EdgeR (v3.0) Bioconductor package [96]. We excluded mRNAs without at least one count per  
607 million in the replicates (low overall sum of counts) from the analyses as previously suggested [97].  
608 We then normalized the library sizes of all samples according to the trimmed mean of M-values  
609 method, and dispersion was estimated from the replicates using the quantile-adjusted conditional  
610 maximum likelihood method. Pairwise comparisons of differential gene expression between the  
611 RNA-seq samples were performed using the function of Exact test. We used the corrected FDR  
612  $P$ -value  $< 0.01$ , and  $\log_{2}FC > 1$  and  $\log_{2}FC < -1$  cut-offs for significance.

### 613 **qRT-PCR**

614 We carried out qRT-PCR reactions, each in triplicate, using an Applied Biosystems 7500 Fast  
615 Real-Time PCR System and 2X KAPA SYBR FAST qPCR Master Mix (KAPA Biosystems Woburn,  
616 MA). To perform the absolute quantification of DWV RNA, we first prepared standard curves for  
617 DNA corresponding to DWV target RNA. The target DNA was prepared by PCR followed by the gel  
618 extraction. The DNA concentration was measured using Nanodrop 2000 spectrophotometer (Thermo  
619 Scientific, USA) to calculate the original copy number by a formula; Copy number = DNA  
620 concentration (ng/ $\mu$ l)  $\times 6.02 \times 10^{23}$  (copies/mol) / length (bp)  $\times 6.6 \times 10^{11}$  (ng/mol), in which  
621  $6.6 \times 10^{11}$  ng/mol is the average molecular mass of one base pair, and  $6.022 \times 10^{23}$  copies/mol is the  
622 Avogadro’s number. Linear standard curves were then generated using target DNA of  $10^5$ – $10^9$  copy  
623 number per reaction followed by plotting the Ct values against log values of the copy number. After  
624 reverse transcription, the copy number of target RNA in a sample was estimated using the standard  
625 curve above. To carry out the relative quantification, we compared the relative expression levels of  
626 the target mRNA to *Ef-1 $\alpha$*  mRNA as the internal reference using the  $2^{-\Delta\Delta Ct}$  method. All primers used  
627 for qRT-PCR are listed in Supplementary Table 28.

### 628 **Proteomic analysis**

629 Pools of male or female ites were lysed by sonication in 0.1 % (w/v) Rapigest (Waters MS  
630 technologies) in 50 mM ammonium bicarbonate. Samples were heated at 80 °C for 10 min, reduced  
631 with 3 mM DTT at 60 °C for 10 min, cooled, then alkylated with 9 mM iodoacetamide (Sigma) for  
632 30 min (room temperature) protected from light; all steps were performed with intermittent  
633 vortex-mixing. Proteomic-grade trypsin (Sigma) was added at a protein:trypsin ratio of 50:1 and  
634 incubated at 37 °C overnight. Rapigest was removed by adding TFA to a final concentration of 1 %  
635 (v/v) and incubating at 37 °C for 2 hours. Peptide samples were centrifuged at 12,000 x g for 60 min  
636 (4 °C) to remove precipitated Rapigest. The peptide supernatant was desalted using C<sub>18</sub>  
637 reverse-phase stage tips (Thermo Scientific) according to the manufacturer’s instructions. Samples  
638 were desalted and reduced to dryness as above and re-suspended in 3 % (v/v) acetonitrile, 0.1 % (v/v)  
639 TFA for analysis by MS.

640 Peptides were analysed by on-line nanoflow LC using the nanoACQUITY-nLC system (Waters  
641 MS technologies) coupled with Q-Exactive mass spectrometer (Thermo Scientific). Samples were  
642 loaded on a 50cm Easy-Spray column with an internal diameter of 75  $\mu$ m, packed with 2  $\mu$ m C<sub>18</sub>  
643 particles, fused to a silica nano-electrospray emitter (Thermo Scientific). The column was operated at  
644 a constant temperature of 35 °C. Chromatography was performed with a buffer system consisting of  
645 0.1 % formic acid (buffer A) and 80 % acetonitrile in 0.1 % formic acid (buffer B). The peptides



646 were separated by a linear gradient of 3.8 – 50 % buffer B over 90 minutes at a flow rate of 300  
647 nl/min. The Q-Exactive was operated in data-dependent mode with survey scans acquired at a  
648 resolution of 70,000. Up to the top 10 most abundant isotope patterns with charge states +2, +3  
649 and/or +4 from the survey scan were selected with an isolation window of 2.0Th and fragmented by  
650 higher energy collisional dissociation with normalized collision energies of 30. The maximum ion  
651 injection times for the survey scan and the MS/MS scans were 250 and 50 ms, respectively, and the  
652 ion target value was set to 1E6 for survey scans and 1E5 for the MS/MS scans. Repetitive  
653 sequencing of peptides was minimized through dynamic exclusion of the sequenced peptides for 20s.

654 Thermo RAW files were imported into Progenesis LC–MS (version 4.1, Nonlinear Dynamics).  
655 Runs were time aligned using default settings and using an auto selected run as reference. Peaks  
656 were picked by the software using default settings and filtered to include only peaks with a charge  
657 state between +2 and +7. Spectral data were converted into .mgf files with Progenesis LC–MS and  
658 exported for peptide identification using the Mascot (version 2.3.02, Matrix Science) search engine.  
659 Tandem MS data were searched against translated ORFs from *T. mercedesae*, *Apis mellifera*  
660 (OGSv3.2) [98] and Deformed Wing Virus (Uniprot 08 2016) (total; 30,666 sequences; 12,194,618  
661 residues). The search parameters were as follows: precursor mass tolerance was set to 10 ppm and  
662 fragment mass tolerance was set as 0.01Da. Two missed tryptic cleavages were permitted.  
663 Carbamidomethylation (cysteine) was set as a fixed modification and oxidation (methionine) set as  
664 variable modification. Mascot search results were further validated using the machine learning  
665 algorithm Percolator embedded within Mascot. The Mascot decoy database function was utilised and  
666 the false discovery rate was < 1%, while individual percolator ion scores >13 indicated identity or  
667 extensive homology ( $P < 0.05$ ). Mascot search results were imported into Progenesis LC–MS as  
668 XML files. Peptide intensities were normalised against the reference run by Progenesis LC-MS and  
669 these intensities are used to highlight relative differences in protein expression between samples. The  
670 mass spectrometry proteomics data have been deposited to the ProteomeXchange Consortium via the  
671 PRIDE [99] partner repository with the dataset identifier PXD004997.

### 672 **Data availability**

674 All sequence data we obtained and analyzed are deposited under the project accession number  
675 PRJNA343868 in NCBI. Proteomics data have been deposited to the ProteomeXchange Consortium  
676 via the PRIDE [99] partner repository with the dataset identifier PXD004997. Additional supporting  
677 data is also available via the *GigaScience* GigaDB repository [100].

### 678 **Additional files**

- 680 Supplementary file1
- 681 Supplementary Tables
- 682 Supplementary Figures

### 683 **Abbreviations**

685 CCE: Carboxylesterase; CSP: Chemosensory protein; CYP: Cytochrome P450; ABC transporter:  
686 ATP-binding cassette transporter; GR: Gustatory receptor; GST: Glutathione-S-transferase; IR:  
687 Ionotropic receptor; OBP: Odorant binding protein; OR: Olfactory receptor; P450: Cytochrome P450;

688 DWV: Deformed wing virus; MS: Mass spectrometry.

689

### 690 **Competing interests**

691 We declare no competing interests.

692

### 693 **Authors' contributions**

694 XD conducted all experiments except the proteomic analyses which were carried out by SDA and  
695 DX. TK, ACD, and BLM planned and supervised the research. XD and TK wrote the manuscript,  
696 which was revised by ACD and BLM.

697

### 698 **Acknowledgements**

699 This work was supported in part by 2012 Suzhou Science and Technology Development Planning  
700 Programme (Grant#: SYN201213) and Jinji Lake Double Hundred Talents Programme to TK. We  
701 thank the Centre for Genomic Research at the University of Liverpool for *Tropilaelaps* mite genome  
702 sequencing and Frances Blow for helping to construct the DNA libraries. We are grateful to local bee  
703 keepers in Jiangsu province for providing honey bee colonies.

704

### 705 **References**

- 706 1. Vanengelsdorp D, Meixner MD. A historical review of managed honey bee populations in Europe  
707 and the United States and the factors that may affect them. *J Invertebr Pathol.* 2010;103 Suppl  
708 1:S80-95. doi:10.1016/j.jip.2009.06.011.
- 709 2. Evans JD, Schwarz RS. Bees brought to their knees: microbes affecting honey bee health. *Trends*  
710 *in Microbiology.* 2011;19(12):614-20. doi:10.1016/j.tim.2011.09.003.
- 711 3. Rosenkranz P, Aumeier P, Ziegelmann B. Biology and control of *Varroa destructor*. *Journal of*  
712 *invertebrate pathology.* 2010;103 Suppl 1:S96-119. doi:10.1016/j.jip.2009.07.016.
- 713 4. Anderson DL, Roberts JMK. Standard methods for *Tropilaelaps* mites research. *Journal of*  
714 *Apicultural Research.* 2013;52(4). doi:10.3896/ibra.1.52.4.21.
- 715 5. Sammataro D, Gerson U, Needham G. Parasitic mites of honey bees: Life history, implications,  
716 and impact. *Annual Review of Entomology.* 2000;45:519-48. doi:10.1146/annurev.ento.45.1.519.
- 717 6. Dainat B, Ken T, Berthoud H, Neumann P. The ectoparasitic mite *Tropilaelaps mercedesae* (Acari,  
718 *Laelapidae*) as a vector of honeybee viruses. *Insectes Sociaux.* 2009;56(1):40-3.  
719 doi:10.1007/s00040-008-1030-5.
- 720 7. Forsgren E, de Miranda JR, Isaksson M, Wei S, Fries I. Deformed wing virus associated with  
721 *Tropilaelaps mercedesae* infesting European honey bees (*Apis mellifera*). *Experimental and Applied*  
722 *Acarology.* 2009;47(2):87-97. doi:10.1007/s10493-008-9204-4.
- 723 8. Khongphinitbunjong K, de Guzman L, Tarver M, Rinderer T, Chantawannakul P. Interactions of  
724 *Tropilaelaps mercedesae*, honey bee viruses and immune response in *Apis mellifera*. *Journal of*  
725 *Apicultural Research.* 2015;54(1):40-7. doi:10.1080/00218839.2015.1041311.
- 726 9. Khongphinitbunjong K, Neumann P, Chantawannakul P, Williams G. The ectoparasitic mite  
727 *Tropilaelaps mercedesae* reduces western honey bee, *Apis mellifera*, longevity and emergence weight,  
728 and promotes Deformed wing virus infections. *Journal of Invertebrate Pathology.* 2016;137:38-42.  
729 doi:10.1016/j.jip.2016.04.006.

60

61

62

63

64

65

- 730 10. Oldroyd BP. Coevolution while you wait: *Varroa jacobsoni*, a new parasite of western honeybees.  
731 Trends Ecol Evol. 1999;14(8):312-5.
- 732 11. Cornman SR, Schatz MC, Johnston SJ, Chen YP, Pettis J, Hunt G et al. Genomic survey of the  
733 ectoparasitic mite *Varroa destructor*, a major pest of the honey bee *Apis mellifera*. BMC Genomics.  
734 2010;11:602. doi:10.1186/1471-2164-11-602.
- 735 12. Parra G, Bradnam K, Korf I. CEGMA: a pipeline to accurately annotate core genes in eukaryotic  
736 genomes. Bioinformatics. 2007;23(9):1061-7. doi:10.1093/bioinformatics/btm071.
- 737 13. Simão FA, Waterhouse RM, Ioannidis P, Kriventseva EV, Zdobnov EM. BUSCO: assessing  
738 genome assembly and annotation completeness with single-copy orthologs. Bioinformatics.  
739 2015;31(19):3210-2. doi:10.1093/bioinformatics/btv351.
- 740 14. Xu X, Pan S, Cheng S, Zhang B, Mu D, Ni P et al. Genome sequence and analysis of the tuber  
741 crop potato. Nature. 2011;475(7355):189-95. doi:10.1038/nature10158.
- 742 15. Grbic M, Van Leeuwen T, Clark R, Rombauts S, Rouze P, Grbic V et al. The genome of  
743 *Tetranychus urticae* reveals herbivorous pest adaptations. Nature. 2011;479(7374):487-92.  
744 doi:10.1038/nature10640.
- 745 16. Jeyaprakash A, Hoy MA. The nuclear genome of the phytoseiid *Metaseiulus occidentalis* (Acari:  
746 Phytoseiidae) is among the smallest known in arthropods. Exp Appl Acarol. 2009;47(4):263-73.  
747 doi:10.1007/s10493-008-9227-x.
- 748 17. Chan TF, Ji KM, Yim AK, Liu XY, Zhou JW, Li RQ et al. The draft genome, transcriptome, and  
749 microbiome of *Dermatophagoides farinae* reveal a broad spectrum of dust mite allergens. J Allergy  
750 Clin Immunol. 2015;135(2):539-48. doi:10.1016/j.jaci.2014.09.031.
- 751 18. Rider SD, Morgan MS, Arlian LG. Draft genome of the scabies mite. Parasit Vectors. 2015;8:585.  
752 doi:10.1186/s13071-015-1198-2.
- 753 19. Gulia-Nuss M, Nuss AB, Meyer JM, Sonenshine DE, Roe RM, Waterhouse RM et al. Genomic  
754 insights into the *Ixodes scapularis* tick vector of Lyme disease. Nat Commun. 2016;7:10507.  
755 doi:10.1038/ncomms10507.
- 756 20. Gu XB, Liu GH, Song HQ, Liu TY, Yang GY, Zhu XQ. The complete mitochondrial genome of  
757 the scab mite *Psoroptes cuniculi* (Arthropoda: Arachnida) provides insights into Acari phylogeny.  
758 Parasit Vectors. 2014;7:340. doi:10.1186/1756-3305-7-340.
- 759 21. Hoy MA, Waterhouse RM, Wu K, Estep AS, Ioannidis P, Palmer WJ et al. Genome Sequencing  
760 of the Phytoseiid Predatory Mite *Metaseiulus occidentalis* Reveals Completely Atomized Hox Genes  
761 and Superdynamic Intron Evolution. Genome Biol Evol. 2016;8(6):1762-75.  
762 doi:10.1093/gbe/evw048.
- 763 22. Stern D. The genetic causes of convergent evolution. Nature Reviews Genetics.  
764 2013;14(11):751-64. doi:10.1038/nrg3483.
- 765 23. Charles JP. The regulation of expression of insect cuticle protein genes. Insect Biochem Mol Biol.  
766 2010;40(3):205-13. doi:10.1016/j.ibmb.2009.12.005.
- 767 24. KAUFMAN W, AESCHLIMANN A, DIEHL P. REGULATION OF BODY VOLUME BY  
768 SALIVATION IN A TICK CHALLENGED WITH FLUID LOADS. American Journal of Physiology.  
769 1980;238(1):R102-R12.
- 770 25. SAUER J, MCSWAIN J, BOWMAN A, ESSENBERG R. TICK SALIVARY-GLAND  
771 PHYSIOLOGY. Annual Review of Entomology. 1995;40:245-67.

- 772 doi:10.1146/annurev.en.40.010195.001333.
- 773 26. Tautz J, Maier S, Groh C, Rossler W, Brockmann A. Behavioral performance in adult honey bees  
774 is influenced by the temperature experienced during their pupal development. Proc Natl Acad Sci U  
775 S A. 2003;100(12):7343-7. doi:10.1073/pnas.1232346100.
- 776 27. Nagata T, Koyanagi M, Tsukamoto H, Terakita A. Identification and characterization of a  
777 protostome homologue of peropsin from a jumping spider. J Comp Physiol A Neuroethol Sens  
778 Neural Behav Physiol. 2010;196(1):51-9. doi:10.1007/s00359-009-0493-9.
- 779 28. Joseph RM, Carlson JR. Drosophila Chemoreceptors: A Molecular Interface Between the  
780 Chemical World and the Brain. Trends Genet. 2015. doi:10.1016/j.tig.2015.09.005.
- 781 29. Croset V, Rytz R, Cummins SF, Budd A, Brawand D, Kaessmann H et al. Ancient protostome  
782 origin of chemosensory ionotropic glutamate receptors and the evolution of insect taste and olfaction.  
783 PLoS Genet. 2010;6(8):e1001064. doi:10.1371/journal.pgen.1001064.
- 784 30. Rytz R, Croset V, Benton R. Ionotropic receptors (IRs): chemosensory ionotropic glutamate  
785 receptors in Drosophila and beyond. Insect Biochem Mol Biol. 2013;43(9):888-97.  
786 doi:10.1016/j.ibmb.2013.02.007.
- 787 31. Chen C, Buhl E, Xu M, Croset V, Rees JS, Lilley KS et al. Drosophila Ionotropic Receptor 25a  
788 mediates circadian clock resetting by temperature. Nature. 2015;527(7579):516-20.  
789 doi:10.1038/nature16148.
- 790 32. Ni L, Klein M, Svec KV, Budelli G, Chang EC, Ferrer AJ et al. The Ionotropic Receptors IR21a  
791 and IR25a mediate cool sensing in Drosophila. Elife. 2016;5. doi:10.7554/eLife.13254.
- 792 33. Cruz MDS, Robles MCV, Jespersen JB, Kilpinen O, Birkett M, Dewhirst S et al. Scanning  
793 electron microscopy of foreleg tarsal sense organs of the poultry red mite, *Dermanyssus gallinae*  
794 (DeGeer) (Acari : Dermanyssidae). Micron. 2005;36(5):415-21. doi:10.1016/j.micron.2005.03.003.
- 795 34. Robertson HM, Warr CG, Carlson JR. Molecular evolution of the insect chemoreceptor gene  
796 superfamily in Drosophila melanogaster. Proc Natl Acad Sci U S A. 2003;100 Suppl 2:14537-42.  
797 doi:10.1073/pnas.2335847100.
- 798 35. Chipman AD, Ferrier DE, Brena C, Qu J, Hughes DS, Schröder R et al. The first myriapod  
799 genome sequence reveals conservative arthropod gene content and genome organisation in the  
800 centipede *Strigamia maritima*. PLoS Biol. 2014;12(11):e1002005. doi:10.1371/journal.pbio.1002005.
- 801 36. Li X, Schuler MA, Berenbaum MR. Molecular mechanisms of metabolic resistance to synthetic  
802 and natural xenobiotics. Annu Rev Entomol. 2007;52:231-53.  
803 doi:10.1146/annurev.ento.51.110104.151104.
- 804 37. Iga M, Kataoka H. Recent studies on insect hormone metabolic pathways mediated by  
805 cytochrome P450 enzymes. Biol Pharm Bull. 2012;35(6):838-43.
- 806 38. Toutant JP. Insect acetylcholinesterase: catalytic properties, tissue distribution and molecular  
807 forms. Prog Neurobiol. 1989;32(5):423-46.
- 808 39. Dermauw W, Van Leeuwen T. The ABC gene family in arthropods: comparative genomics and  
809 role in insecticide transport and resistance. Insect Biochem Mol Biol. 2014;45:89-110.  
810 doi:10.1016/j.ibmb.2013.11.001.
- 811 40. Kirkness EF, Haas BJ, Sun W, Braig HR, Perotti MA, Clark JM et al. Genome sequences of the  
812 human body louse and its primary endosymbiont provide insights into the permanent parasitic  
813 lifestyle. Proc Natl Acad Sci U S A. 2010;107(27):12168-73. doi:10.1073/pnas.1003379107.

- 814 41. Wu K, Hoy MA. The Glutathione-S-Transferase, Cytochrome P450 and Carboxyl/Cholinesterase  
815 Gene Superfamilies in Predatory Mite *Metaseiulus occidentalis*. PLoS One. 2016;11(7):e0160009.  
816 doi:10.1371/journal.pone.0160009.
- 817 42. Enayati AA, Ranson H, Hemingway J. Insect glutathione transferases and insecticide resistance.  
818 Insect Mol Biol. 2005;14(1):3-8. doi:10.1111/j.1365-2583.2004.00529.x.
- 819 43. Yu QY, Lu C, Li WL, Xiang ZH, Zhang Z. Annotation and expression of carboxylesterases in the  
820 silkworm, *Bombyx mori*. BMC Genomics. 2009;10:553. doi:10.1186/1471-2164-10-553.
- 821 44. Gempe T, Beye M. Function and evolution of sex determination mechanisms, genes and  
822 pathways in insects. Bioessays. 2011;33(1):52-60. doi:10.1002/bies.201000043.
- 823 45. Nelson-Rees WA, Hoy MA, Roush RT. Heterochromatinization, chromatin elimination and  
824 haploidization in the parahaploid mite *Metaseiulus occidentalis* (Nesbitt) (Acarina: Phytoseiidae).  
825 Chromosoma. 1980;77(3):263-76.
- 826 46. Sutovsky P. Sperm proteasome and fertilization. Reproduction. 2011;142(1):1-14.  
827 doi:10.1530/REP-11-0041.
- 828 47. Baker ME. Evolution of 17beta-hydroxysteroid dehydrogenases and their role in androgen,  
829 estrogen and retinoid action. Mol Cell Endocrinol. 2001;171(1-2):211-5.
- 830 48. Britton C, Murray L. Cathepsin L protease (CPL-1) is essential for yolk processing during  
831 embryogenesis in *Caenorhabditis elegans*. J Cell Sci. 2004;117(Pt 21):5133-43.  
832 doi:10.1242/jcs.01387.
- 833 49. Mediannikov O, Sekeyová Z, Birg ML, Raoult D. A novel obligate intracellular  
834 gamma-proteobacterium associated with ixodid ticks, *Diplorickettsia massiliensis*, Gen. Nov., Sp.  
835 Nov. PLoS One. 2010;5(7):e11478. doi:10.1371/journal.pone.0011478.
- 836 50. Chaisiri K, McGarry JW, Morand S, Makepeace BL. Symbiosis in an overlooked microcosm: a  
837 systematic review of the bacterial flora of mites. Parasitology. 2015;142(9):1152-62.  
838 doi:10.1017/S0031182015000530.
- 839 51. Dunning Hotopp JC, Clark ME, Oliveira DC, Foster JM, Fischer P, Muñoz Torres MC et al.  
840 Widespread lateral gene transfer from intracellular bacteria to multicellular eukaryotes. Science.  
841 2007;317(5845):1753-6. doi:10.1126/science.1142490.
- 842 52. Leclerque A. Whole genome-based assessment of the taxonomic position of the arthropod  
843 pathogenic bacterium *Rickettsiella grylli*. FEMS Microbiol Lett. 2008;283(1):117-27.  
844 doi:10.1111/j.1574-6968.2008.01158.x.
- 845 53. Yang B, Peng G, Li T, Kadowaki T. Molecular and phylogenetic characterization of honey bee  
846 viruses, *Nosema* microsporidia, protozoan parasites, and parasitic mites in China. Ecology and  
847 Evolution. 2013;3(2):298-311. doi:10.1002/ece3.464.
- 848 54. Erban T, Harant K, Hubalek M, Vitamvas P, Kamler M, Poltronieri P et al. In-depth proteomic  
849 analysis of *Varroa destructor*: Detection of DWV-complex, ABPV, VdMLV and honeybee proteins in  
850 the mite. Sci Rep. 2015;5:13907. doi:10.1038/srep13907.
- 851 55. Mordecai GJ, Wilfert L, Martin SJ, Jones IM, Schroeder DC. Diversity in a honey bee pathogen:  
852 first report of a third master variant of the Deformed Wing Virus quasispecies. ISME J.  
853 2016;10(5):1264-73. doi:10.1038/ismej.2015.178.
- 854 56. Martin S, Highfield A, Brettell L, Villalobos E, Budge G, Powell M et al. Global Honey Bee Viral  
855 Landscape Altered by a Parasitic Mite. Science. 2012;336(6086):1304-6.

- 856 doi:10.1126/science.1220941.
- 857 57. Anderson DL, Morgan MJ. Genetic and morphological variation of bee-parasitic Tropiclaelaps  
858 mites (Acari: Laelapidae): new and re-defined species. *Exp Appl Acarol.* 2007;43(1):1-24.  
859 doi:10.1007/s10493-007-9103-0.
- 860 58. Martin M. Cutadapt removes adapter sequences from highthroughput sequencing reads. *EMBnet.*  
861 *journal* 17: 10–12. 2011.
- 862 59. Joshi N, Fass J. Sickle: A sliding-window, adaptive, quality-based trimming tool for FastQ files  
863 (Version 1.33)[Software]. Available at <https://github.com/najoshi/sickle>. 2011.
- 864 60. Geraci NS, Spencer Johnston J, Paul Robinson J, Wikel SK, Hill CA. Variation in genome size of  
865 argasid and ixodid ticks. *Insect Biochem Mol Biol.* 2007;37(5):399-408.  
866 doi:10.1016/j.ibmb.2006.12.007.
- 867 61. Bennett M, Leitch I, Price H, Johnston J. Comparisons with *Caenorhabditis* (similar to 100 Mb)  
868 and *Drosophila* (similar to 175 Mb) using flow cytometry show genome size in *Arabidopsis* to be  
869 similar to 157 Mb and thus similar to 25 % larger than the *Arabidopsis* genome initiative estimate of  
870 similar to 125 Mb. *Annals of Botany.* 2003;91(5):547-57. doi:10.1093/aob/mcg057.
- 871 62. Weinstock G, Robinson G, Gibbs R, Worley K, Evans J, Maleszka R et al. Insights into social  
872 insects from the genome of the honeybee *Apis mellifera*. *Nature.* 2006;443(7114):931-49.  
873 doi:10.1038/nature05260.
- 874 63. Marcais G, Kingsford C. A fast, lock-free approach for efficient parallel counting of occurrences  
875 of k-mers. *Bioinformatics.* 2011;27(6):764-70. doi:10.1093/bioinformatics/btr011.
- 876 64. Zhang G, Fang X, Guo X, Li L, Luo R, Xu F et al. The oyster genome reveals stress adaptation  
877 and complexity of shell formation. *Nature.* 2012;490(7418):49-54. doi:10.1038/nature11413.
- 878 65. Langmead B, Salzberg SL. Fast gapped-read alignment with Bowtie 2. *Nature methods.*  
879 2012;9(4):357-9.
- 880 66. Zerbino D, Birney E. Velvet: Algorithms for de novo short read assembly using de Bruijn graphs.  
881 *Genome Research.* 2008;18(5):821-9. doi:10.1101/gr.074492.107.
- 882 67. Kumar S, Jones M, Koutsovoulos G, Clarke M, Blaxter M. Blobology: exploring raw genome  
883 data for contaminants, symbionts and parasites using taxon-annotated GC-coverage plots. *Frontiers*  
884 *in genetics.* 2013;4:237.
- 885 68. Trapnell C, Pachter L, Salzberg S. TopHat: discovering splice junctions with RNA-Seq.  
886 *Bioinformatics.* 2009;25(9):1105-11. doi:10.1093/bioinformatics/btp120.
- 887 69. Trapnell C, Williams BA, Pertea G, Mortazavi A, Kwan G, van Baren MJ et al. Transcript  
888 assembly and quantification by RNA-Seq reveals unannotated transcripts and isoform switching  
889 during cell differentiation. *Nat Biotechnol.* 2010;28(5):511-5. doi:10.1038/nbt.1621.
- 890 70. Liu J, Xiao H, Huang S, Li F. OMIGA: optimized maker-based insect genome annotation.  
891 *Molecular genetics and genomics.* 2014;289(4):567-73.
- 892 71. Stanke M, Morgenstern B. AUGUSTUS: a web server for gene prediction in eukaryotes that  
893 allows user-defined constraints. *Nucleic Acids Research.* 2005;33:W465-W7.  
894 doi:10.1093/nar/gki458.
- 895 72. Korf I. Gene finding in novel genomes. *Bmc Bioinformatics.* 2004;5.  
896 doi:10.1186/1471-2105-5-59.
- 897 73. Lukashin AV, Borodovsky M. GeneMark.hmm: new solutions for gene finding. *Nucleic Acids*

898 Res. 1998;26(4):1107-15.

899 74. Cantarel B, Korf I, Robb S, Parra G, Ross E, Moore B et al. MAKER: An easy-to-use annotation  
900 pipeline designed for emerging model organism genomes. *Genome Research*. 2008;18(1):188-96.  
901 doi:10.1101/gr.6743907.

902 75. Zdobnov EM, Apweiler R. InterProScan--an integration platform for the signature-recognition  
903 methods in InterPro. *Bioinformatics*. 2001;17(9):847-8.

904 76. Lowe TM, Eddy SR. tRNAscan-SE: a program for improved detection of transfer RNA genes in  
905 genomic sequence. *Nucleic Acids Res*. 1997;25(5):955-64.

906 77. Nawrocki EP, Eddy SR. Infernal 1.1: 100-fold faster RNA homology searches. *Bioinformatics*.  
907 2013;29(22):2933-5. doi:10.1093/bioinformatics/btt509.

908 78. Conesa A, Götz S, García-Gómez JM, Terol J, Talón M, Robles M. Blast2GO: a universal tool  
909 for annotation, visualization and analysis in functional genomics research. *Bioinformatics*.  
910 2005;21(18):3674-6. doi:10.1093/bioinformatics/bti610.

911 79. Kanehisa M, Goto S. KEGG: kyoto encyclopedia of genes and genomes. *Nucleic Acids Res*.  
912 2000;28(1):27-30.

913 80. Adams M, Celniker S, Holt R, Evans C, Gocayne J, Amanatides P et al. The genome sequence of  
914 *Drosophila melanogaster*. *Science*. 2000;287(5461):2185-95. doi:10.1126/science.287.5461.2185.

915 81. Sanggaard KW, Bechsgaard JS, Fang X, Duan J, Dyrland TF, Gupta V et al. Spider genomes  
916 provide insight into composition and evolution of venom and silk. *Nat Commun*. 2014;5:3765.  
917 doi:10.1038/ncomms4765.

918 82. Stein L, Sternberg P, Durbin R, Thierry-Mieg J, Spieth J. WormBase: network access to the  
919 genome and biology of *Caenorhabditis elegans*. *Nucleic Acids Research*. 2001;29(1):82-6.  
920 doi:10.1093/nar/29.1.82.

921 83. Katoh K, Standley DM. MAFFT multiple sequence alignment software version 7: improvements  
922 in performance and usability. *Mol Biol Evol*. 2013;30(4):772-80. doi:10.1093/molbev/mst010.

923 84. Lassmann T, Frings O, Sonnhammer EL. Kalign2: high-performance multiple alignment of  
924 protein and nucleotide sequences allowing external features. *Nucleic Acids Res*. 2009;37(3):858-65.  
925 doi:10.1093/nar/gkn1006.

926 85. Castresana J. Selection of conserved blocks from multiple alignments for their use in  
927 phylogenetic analysis. *Mol Biol Evol*. 2000;17(4):540-52.

928 86. Darriba D, Taboada GL, Doallo R, Posada D. ProtTest 3: fast selection of best-fit models of  
929 protein evolution. *Bioinformatics*. 2011;27(8):1164-5. doi:10.1093/bioinformatics/btr088.

930 87. Guindon S, Dufayard JF, Lefort V, Anisimova M, Hordijk W, Gascuel O. New algorithms and  
931 methods to estimate maximum-likelihood phylogenies: assessing the performance of PhyML 3.0.  
932 *Syst Biol*. 2010;59(3):307-21. doi:10.1093/sysbio/syq010.

933 88. Ronquist F, Huelsenbeck JP. MrBayes 3: Bayesian phylogenetic inference under mixed models.  
934 *Bioinformatics*. 2003;19(12):1572-4.

935 89. Tamura K, Stecher G, Peterson D, Filipinski A, Kumar S. MEGA6: Molecular Evolutionary  
936 Genetics Analysis version 6.0. *Mol Biol Evol*. 2013;30(12):2725-9. doi:10.1093/molbev/mst197.

937 90. Dabert M, Witalinski W, Kazmierski A, Olszanowski Z, Dabert J. Molecular phylogeny of  
938 acariform mites (Acari, Arachnida): strong conflict between phylogenetic signal and long-branch  
939 attraction artifacts. *Mol Phylogenet Evol*. 2010;56(1):222-41. doi:10.1016/j.ympev.2009.12.020.

- 940 91. Li L, Stoeckert CJ, Roos DS. OrthoMCL: identification of ortholog groups for eukaryotic  
941 genomes. *Genome Res.* 2003;13(9):2178-89. doi:10.1101/gr.1224503.
- 942 92. De Bie T, Cristianini N, Demuth JP, Hahn MW. CAFE: a computational tool for the study of gene  
943 family evolution. *Bioinformatics.* 2006;22(10):1269-71. doi:10.1093/bioinformatics/btl097.
- 944 93. Grabherr MG, Haas BJ, Yassour M, Levin JZ, Thompson DA, Amit I et al. Full-length  
945 transcriptome assembly from RNA-Seq data without a reference genome. *Nature biotechnology.*  
946 2011;29(7):644-52.
- 947 94. Li B, Dewey CN. RSEM: accurate transcript quantification from RNA-Seq data with or without  
948 a reference genome. *BMC bioinformatics.* 2011;12(1):1.
- 949 95. Anders S, Pyl PT, Huber W. HTSeq--a Python framework to work with high-throughput  
950 sequencing data. *Bioinformatics.* 2015;31(2):166-9. doi:10.1093/bioinformatics/btu638.
- 951 96. Robinson MD, McCarthy DJ, Smyth GK. edgeR: a Bioconductor package for differential  
952 expression analysis of digital gene expression data. *Bioinformatics.* 2010;26(1):139-40.  
953 doi:10.1093/bioinformatics/btp616.
- 954 97. Bourgon R, Gentleman R, Huber W. Independent filtering increases detection power for  
955 high-throughput experiments. *Proc Natl Acad Sci U S A.* 2010;107(21):9546-51.  
956 doi:10.1073/pnas.0914005107.
- 957 98. Elsik CG, Worley KC, Bennett AK, Beye M, Camara F, Childers CP et al. Finding the missing  
958 honey bee genes: lessons learned from a genome upgrade. *BMC Genomics.* 2014;15:86.  
959 doi:10.1186/1471-2164-15-86.
- 960 99. Vizcaíno JA, Csordas A, del-Toro N, Dianes JA, Griss J, Lavidas I et al. 2016 update of the  
961 PRIDE database and its related tools. *Nucleic Acids Res.* 2016;44(D1):D447-56.  
962 doi:10.1093/nar/gkv1145.
- 963 100. Dong X, Armstrong SD, Xia D, Makepeace BL, Darby AC, Kadowaki T. Supporting data for  
964 "Draft genome of the honey bee ectoparasitic mite, *Tropilaelaps mercedesae*, is shaped by the  
965 parasitic life history". *GigaScience Database.* 2016. doi:http://dx.doi.org/10.5524/100266.
- 966 101. Mounsey KE, Willis C, Burgess ST, Holt DC, McCarthy J, Fischer K. Quantitative PCR-based  
967 genome size estimation of the astigmatid mites *Sarcoptes scabiei*, *Psoroptes ovis* and  
968 *Dermatophagoides pteronyssinus*. *Parasites & vectors.* 2012;5(1):1. doi:10.1186/1756-3305-5-3.
- 969 102. Sánchez - Gracia A, Vieira FG, Almeida FC, Rozas J. Comparative genomics of the major  
970 chemosensory gene families in Arthropods. *eLS.* 2011. doi:10.1002/9780470015902.a0022848.
- 971 103. Feyereisen R, Lawrence I. 8-insect CYP genes and P450 enzymes. *Insect molecular biology  
972 and biochemistry.* 2012:236-316. doi:10.1016/B978-0-12-384747-8.10008-X.



975 Table 1 Genome statistics of *T. mercedesae* and other arachnid species

| Species                        | Acari: Parasitiformes          |                                 |                          |                          | Acari: Acariformes              |                          |                            | Araneae                      |                                  | Scorpiones                  |
|--------------------------------|--------------------------------|---------------------------------|--------------------------|--------------------------|---------------------------------|--------------------------|----------------------------|------------------------------|----------------------------------|-----------------------------|
|                                | <i>Tropilaelaps mercedesae</i> | <i>Metaseiulus occidentalis</i> | <i>Varroa destructor</i> | <i>Ixodes scapularis</i> | <i>Dermatophagoides farinae</i> | <i>Sarcoptes scabiei</i> | <i>Tetranychus urticae</i> | <i>Stegodyphus mimosarum</i> | <i>Acanthoscurria geniculata</i> | <i>Mesobuthus martensii</i> |
| Estimated genome size (Mb)     | 660                            | 88-90                           | 565                      | 2,100                    | -                               | 98                       | 90                         | 2,550                        | 6,500                            | 1,323                       |
| Assembled genome Size (Mb)     | 353                            | 152                             | 294                      | 1,765                    | 54                              | 56                       | 91                         | 2,739                        | 7,178                            | 926                         |
| GC content (%)                 | 44                             | 52                              | 41                       | 45                       | 30                              | 38                       | 32                         | 34                           | 39                               | 30                          |
| Total scaffold number          | 34,155                         | 2,211                           | na                       | 369,492                  | 515                             | 18,860                   | 640                        | 68,653                       | 4,986,575                        | na                          |
| Largest scaffold (kb)          | 327,111                        | 2,438,724                       | na                       | 3,698,136                | 771,048                         | 287,415                  | 6,836,010                  | 2,994,948                    | 819,799                          | 340,307                     |
| N50 size (bp)                  | 28,807                         | 896,831                         | na                       | 76,228                   | 186,342                         | na                       | 2,993,488                  | 480,636                      | 47,837                           | 223,560                     |
| Complete CEGs (%)              | 92                             | 98                              | 68                       | 80                       | 98                              | 98                       | 98                         | 62                           | 33                               | 57                          |
| Partial CEGs (%)               | 98                             | 97                              | 32                       | 42                       | 96                              | 94                       | 95                         | 24                           | 15                               | 24                          |
| Number of protein-coding genes | 15,190                         | 18,338<br>11,430                | 11,432                   | 20,486                   | 16,376                          | 10,473<br>10,644         | 18,414<br>18,224           | 27,135                       | 27,235                           | 73,821                      |
| Average exon length (bp)       | 363                            | 262                             | na                       | 187                      | na                              | 347                      | 334                        | 174                          | na                               | na                          |
| Average intron length (bp)     | 820                            | 647                             | na                       | 2,653                    | na                              | 147                      | 477                        | 4,269                        | na                               | na                          |

976 Data referred to this study and [11, 15, 16, 19, 81, 101].

977  
978  
979 Table 2 The number of genes associated with chemosensory system in *T. mercedesae* and other  
980 arthropods.

| Species                | GR | OR  | IR | OBP | CSP |
|------------------------|----|-----|----|-----|-----|
| <i>T. mercedesae</i>   | 5  | 0   | 8  | 0   | 0   |
| <i>M. occidentalis</i> | 64 | 0   | 65 | 0   | 0   |
| <i>I. scapularis</i>   | 60 | 0   | 22 | 0   | 1   |
| <i>S. maritima</i>     | 77 | 0   | 60 | 0   | 2   |
| <i>D. pulex</i>        | 53 | 0   | 85 | 0   | 3   |
| <i>D. melanogaster</i> | 73 | 62  | 66 | 51  | 4   |
| <i>A. mellifera</i>    | 10 | 163 | 10 | 21  | 6   |
| <i>B. mori</i>         | 56 | 48  | 18 | 44  | 18  |
| <i>A. pisum</i>        | 53 | 48  | 11 | 15  | 13  |
| <i>P. humanus</i>      | 8  | 10  | 12 | 5   | 7   |

981 The numbers of GR (gustatory receptor), OR (olfactory receptor), IR (ionotropic receptor), OBP  
982 (olfactory binding protein), and CSP (chemosensory protein) genes in *T. mercedesae* and nine  
983 arthropod species including *Bombyx mori* and *Acyrtosiphon pisum* are shown. Data referred to  
984 references [35, 102, 21] and this study.

986 Table 3 Comparison of the number of CYP2, 3, 4, and mitochondrial clan members in Insecta,  
 987 Crustacea, and Acari.

|                        | Total   | CYP2    | CYP3    | CYP4 | Mitochondria |
|------------------------|---------|---------|---------|------|--------------|
| <b>Insecta</b>         |         |         |         |      |              |
| <i>D. melanogaster</i> | 88      | 7       | 11      | 32   | 36           |
| <i>A. gambiae</i>      | 105     | 10      | 9       | 46   | 40           |
| <i>A. aegypti</i>      | 160     | 12      | 9       | 57   | 82           |
| <i>B. mori</i>         | 85      | 7       | 12      | 36   | 30           |
| <i>A. mellifera</i>    | 46      | 8       | 6       | 4    | 28           |
| <i>N. vitripennis</i>  | 92      | 7       | 7       | 30   | 48           |
| <i>T. castaneum</i>    | 134     | 8       | 9       | 45   | 72           |
| <i>A. pisum</i>        | 64      | 10      | 8       | 23   | 23           |
| <i>P. humanus</i>      | 36      | 8       | 8       | 9    | 11           |
| <b>Crustacea</b>       |         |         |         |      |              |
| <i>D. pulex</i>        | 75      | 20      | 6       | 37   | 12           |
| <b>Acari</b>           |         |         |         |      |              |
| <i>T. mercedesae</i>   | 56      | 7       | 19      | 20   | 10           |
| <i>M. occidentalis</i> | 75 (63) | 19 (16) | 32 (23) | 19   | 5            |
| <i>T. urticae</i>      | 86      | 48      | 5       | 23   | 10           |

988 The data of four insects, *Anopheles gambiae*, *Aedes aegypti*, *Nasonia vitripennis*, and *Tribolium*  
 989 *castaneum* are also included. Data referred to references [103] and this study. The numbers in  
 990 parentheses are derived from previous report [41].

992 **Figure legends**

993 **Figure 1 Images of *Tropilaelaps mercedesae***

994 (A) Three adult females of *T. mercedesae* infesting the 5th instar honey bee larva. (B) Ventral view  
995 of the nymph (immature female). (C) Ventral view of the adult female.

997 **Figure 2 Comparative genomics.**

998 (A) The species phylogeny was built from aligned protein sequences of 926 one-to-one orthologs in  
999 *Metaseiulus occidentalis*, *Tropilaelaps mercedesae*, *Ixodes scapularis*, *Stegodyphus mimosarum*,  
1000 *Tetranychus urticae*, *Drosophila melanogaster*, *Apis mellifera* and *Caenorhabditis elegans* using a  
1001 maximum likelihood method. The tree was rooted with *C. elegans*. All nodes showed 100%  
1002 bootstrap support. Protein-coding genes were classified into the different categories. 1:1:1 orthologs  
1003 and N:N:N orthologs represent the common orthologs with the same copy numbers and different  
1004 copy numbers, respectively. Patchy orthologs are shared between more than one but not all species  
1005 (excluding those in the previous categories). Unclustered genes represent genes which were not  
1006 classified into orthology cluster. Other categories include arthropod-, Arachnida-, Parasitiformes-,  
1007 and species-specific genes. *C. elegans* was used as the outgroup for classification of the  
1008 protein-coding genes. (B) The number of gene families shared between *T. mercedesae*, *M.*  
1009 *occidentalis*, *I. scapularis*, and other reference species (*S. mimosarum*, *T. urticae*, *D. melanogaster*,  
1010 *A. mellifera* and *C. elegans*) by orthoMCL classification algorithm.

1011  
1012 **Figure 3 Phylogenetic tree of *T. mercedesae*, *I. scapularis*, and *D. melanogaster* gustatory  
1013 receptors.**

1014 Phylogenetic tree of *T. mercedesae* (red), *I. scapularis* (blue), and *D. melanogaster* (green) gustatory  
1015 receptors (GRs) was constructed by a maximum likelihood method. Two clusters of fruit fly GRs  
1016 responding to sugar and CO<sub>2</sub> are indicated. The tree was rooted at the middle point.

1017  
1018 **Figure 4 Phylogeny of *T. mercedesae*, *M. occidentalis*, and *D. melanogaster* cytochrome P450.**

1019 The phylogenetic tree was constructed by maximum likelihood method and rooted at the middle  
1020 point. P450s are clustered to CYP2, CYP3, CYP4, and mitochondrial clans are shown by red, green,  
1021 blue, and dark yellow branches, respectively. *D. melanogaster* (DmCYP), *T. mercedesae*, and *M.*  
1022 *occidentalis* P450s are indicated by dark green, purple, and dark yellow, respectively. *T. mercedesae*  
1023 and *M. occidentalis* P450s are designated by protein IDs.

1024  
1025 **Figure 5 Volcano plot of proteins in the male and female mites.**

1026 Proteins identified in the male and female mites by proteomic analysis are plotted according to the  
1027 ratios of amounts present in male to female. Proteins abundant in the male and female are indicated  
1028 by blue and red circles, respectively. Some of the representative proteins are indicated with the  
1029 names and accession numbers of the best Blast hits.

1030  
1031 **Figure 6 %GC-coverage plots of the preliminary assembled genomes of male and female.**

1032 Individual contigs are plotted based on their GC content (x-axis) and their node coverage (y-axis;  
1033 logarithmic scale). Contigs are colored according to the taxonomic order of their best Megablast hit

1034 to the NCBI nt database (with E-value cut off  $< 1e-5$ ). Contigs without the annotation are in gray. %  
1035 GC plots against node coverage for the (A) male and (B) female contigs are shown in.

1036  
1037 **Figure 7 Classification of DWV in the *T. mercedesae* transcriptomes.**

1038 The Bayesian phylogeny was constructed using Mrbayes based on the amino acid sequences of  
1039 complete DWV genomes assembled from the adult males, adult females and nymphs transcriptomes  
1040 (DWV weixi strain complete genome male, DWV weixi strain complete genome female, and DWV  
1041 weixi strain complete genome nymph) as well as seven other DWV strains (type A variant:  
1042 NC\_005876.1, NC\_004830.2, JQ\_413340, and ERS657948; type B: KC\_786222.1 and  
1043 NC\_006494.1; type C: ERS657949). The tree was rooted with Formica exsecta Virus 1  
1044 (NC\_023022.1) and Sacbrood Virus (NC\_002066.1).

1045  
17  
18  
19  
20  
21  
22  
23  
24  
25  
26  
27  
28  
29  
30  
31  
32  
33  
34  
35  
36  
37  
38  
39  
40  
41  
42  
43  
44  
45  
46  
47  
48  
49  
50  
51  
52  
53  
54  
55  
56  
57  
58  
59  
60  
61  
62  
63  
64  
65

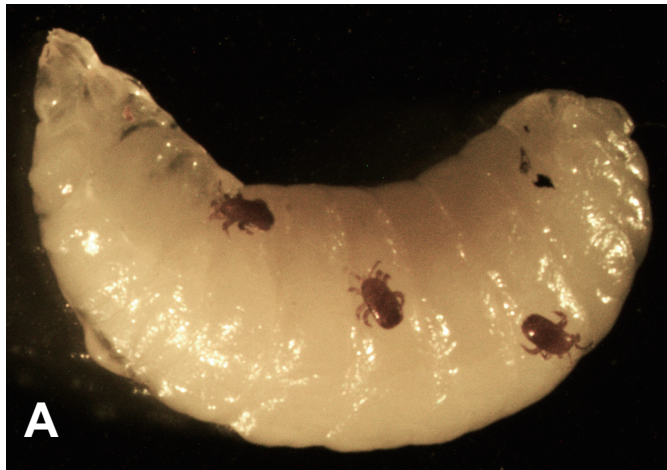

**A**

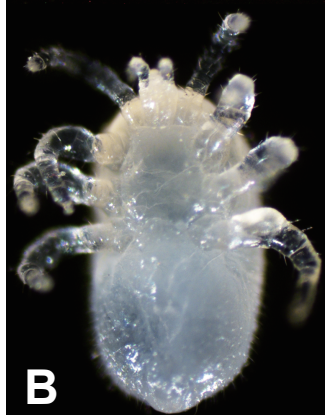

**B**

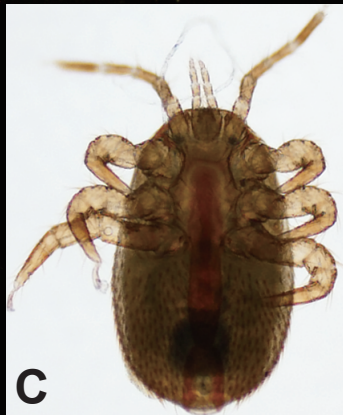

**C**

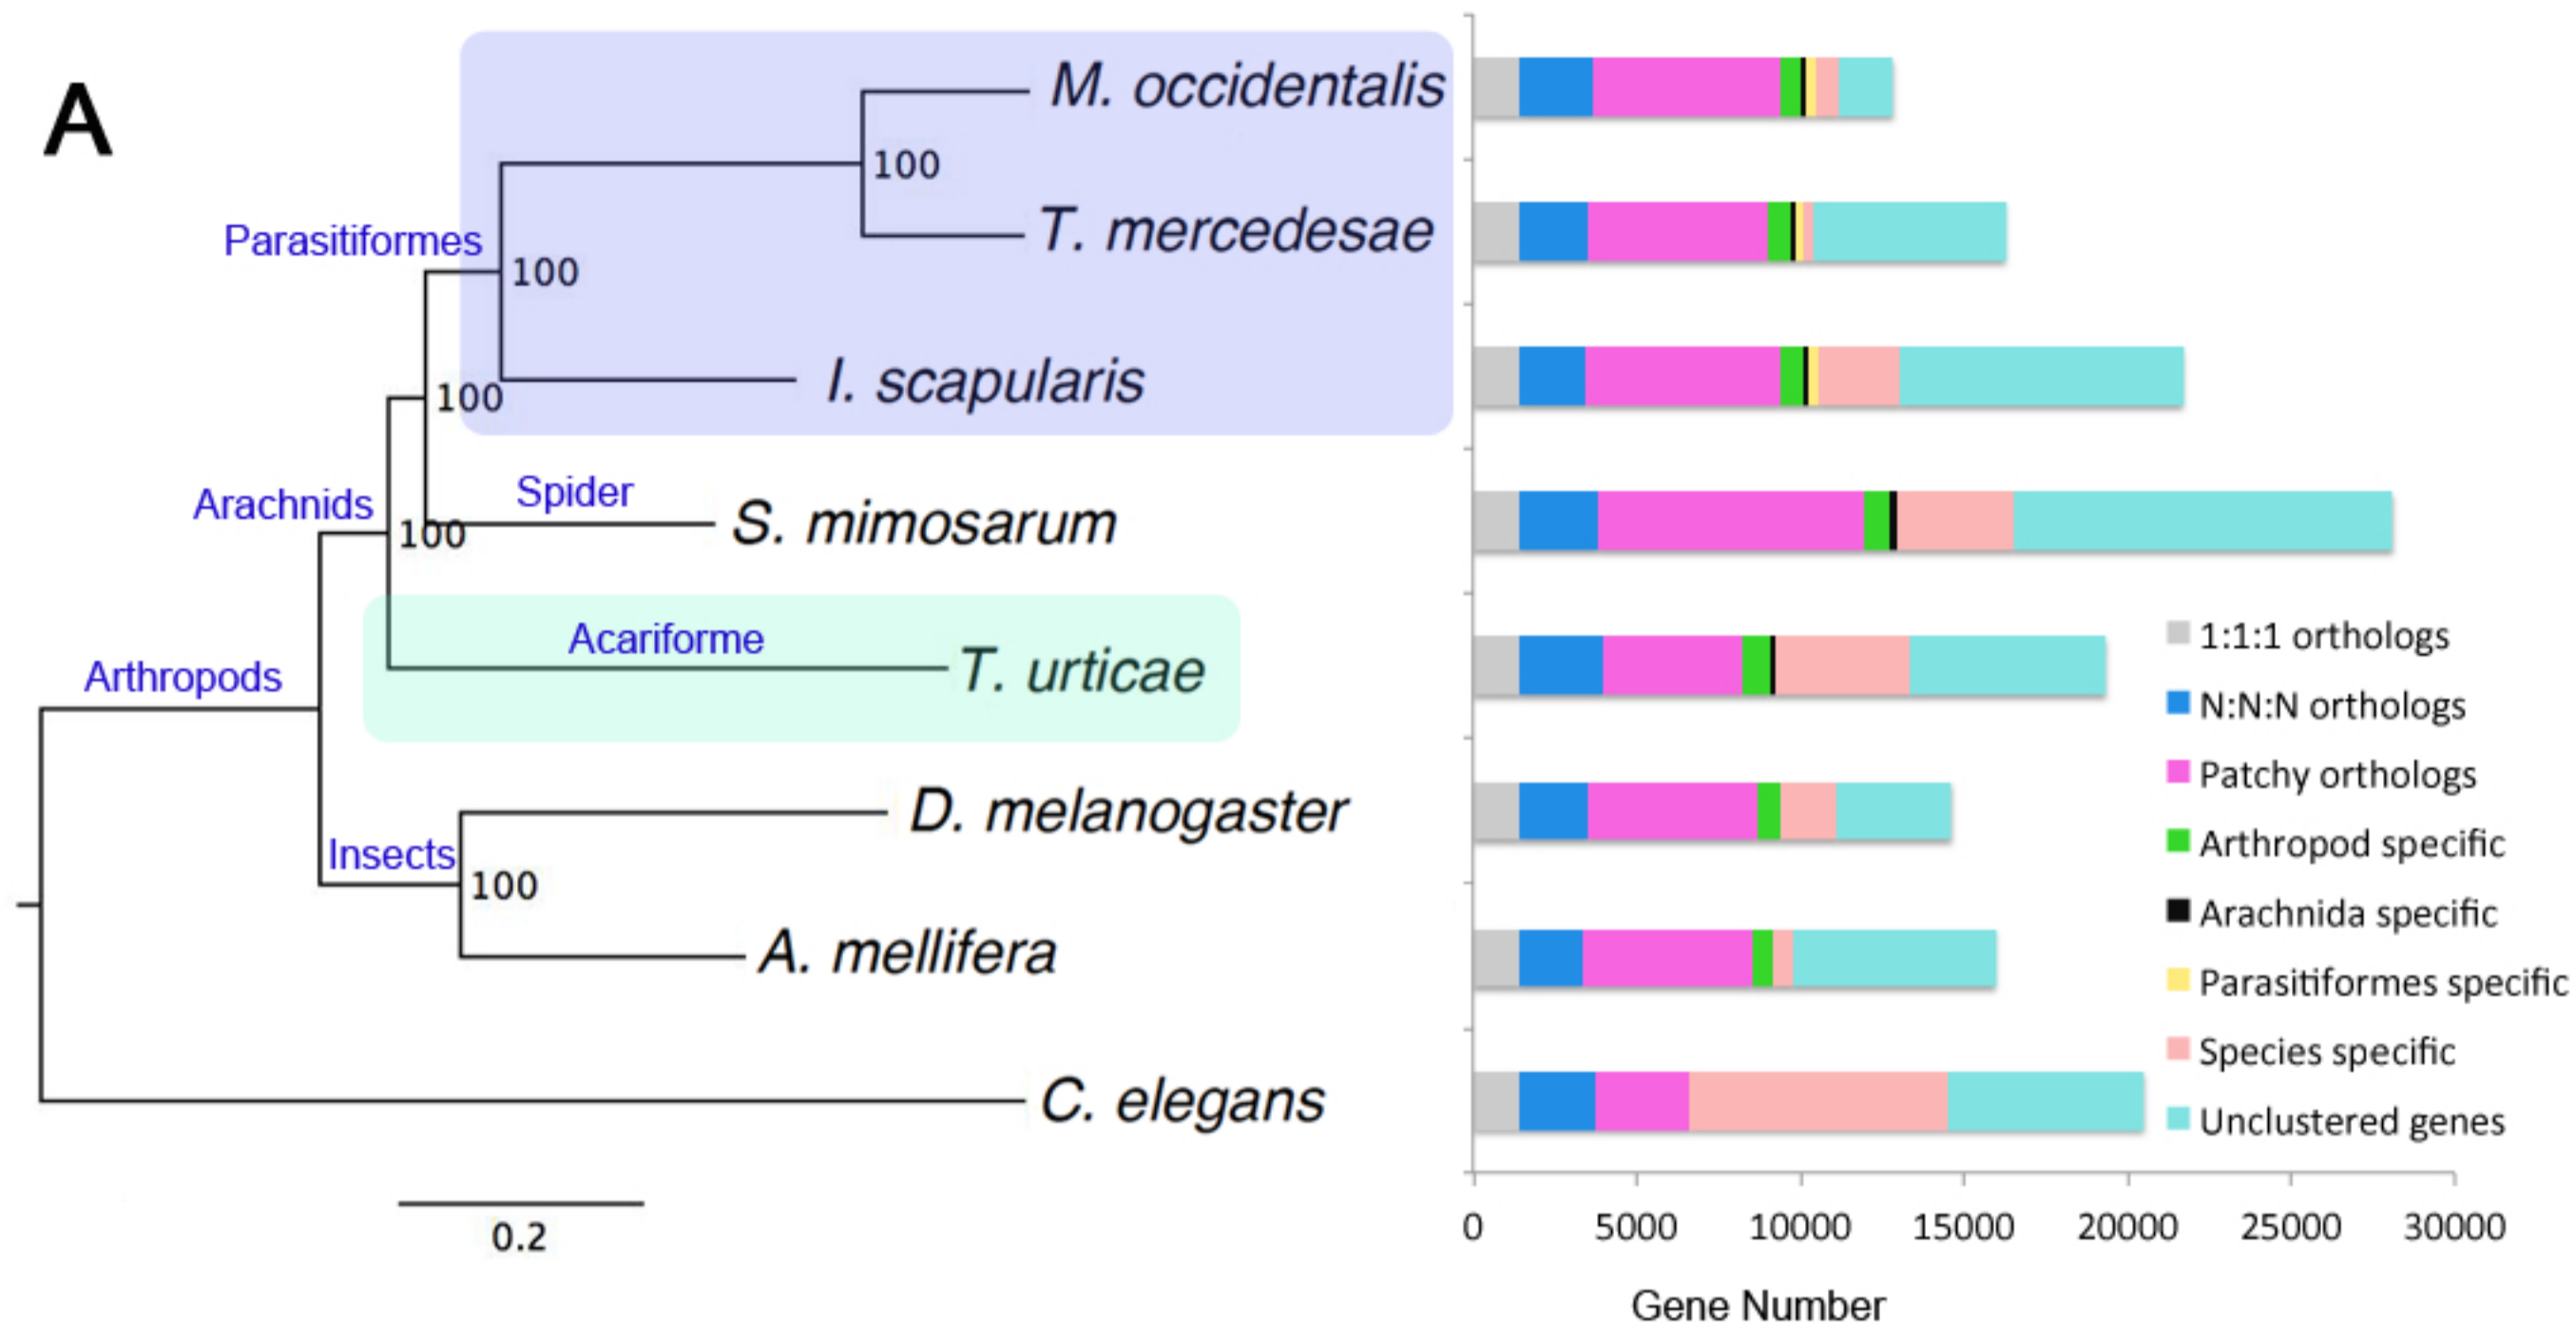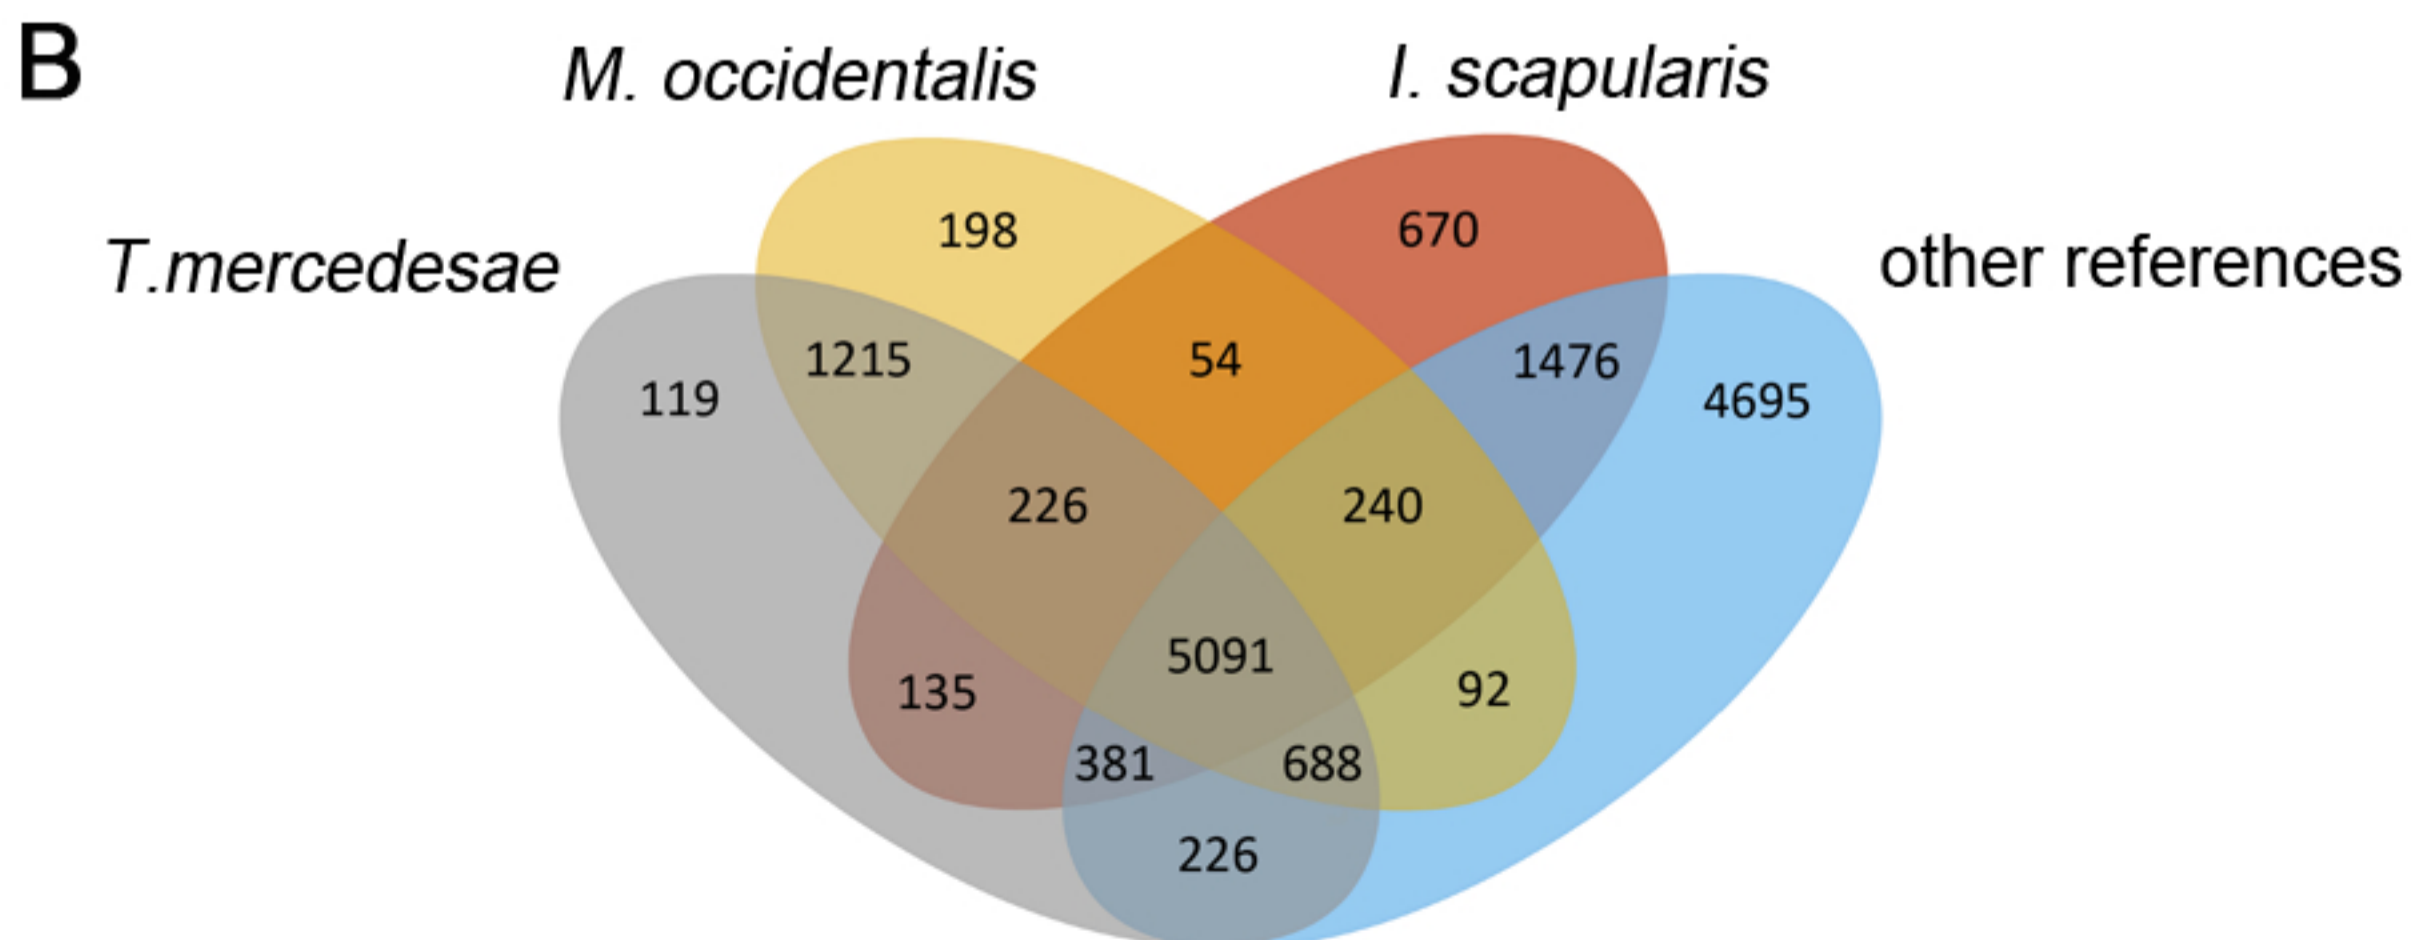



- *Tropilaelaps* mite
- Predatory mite
- Fruit fly

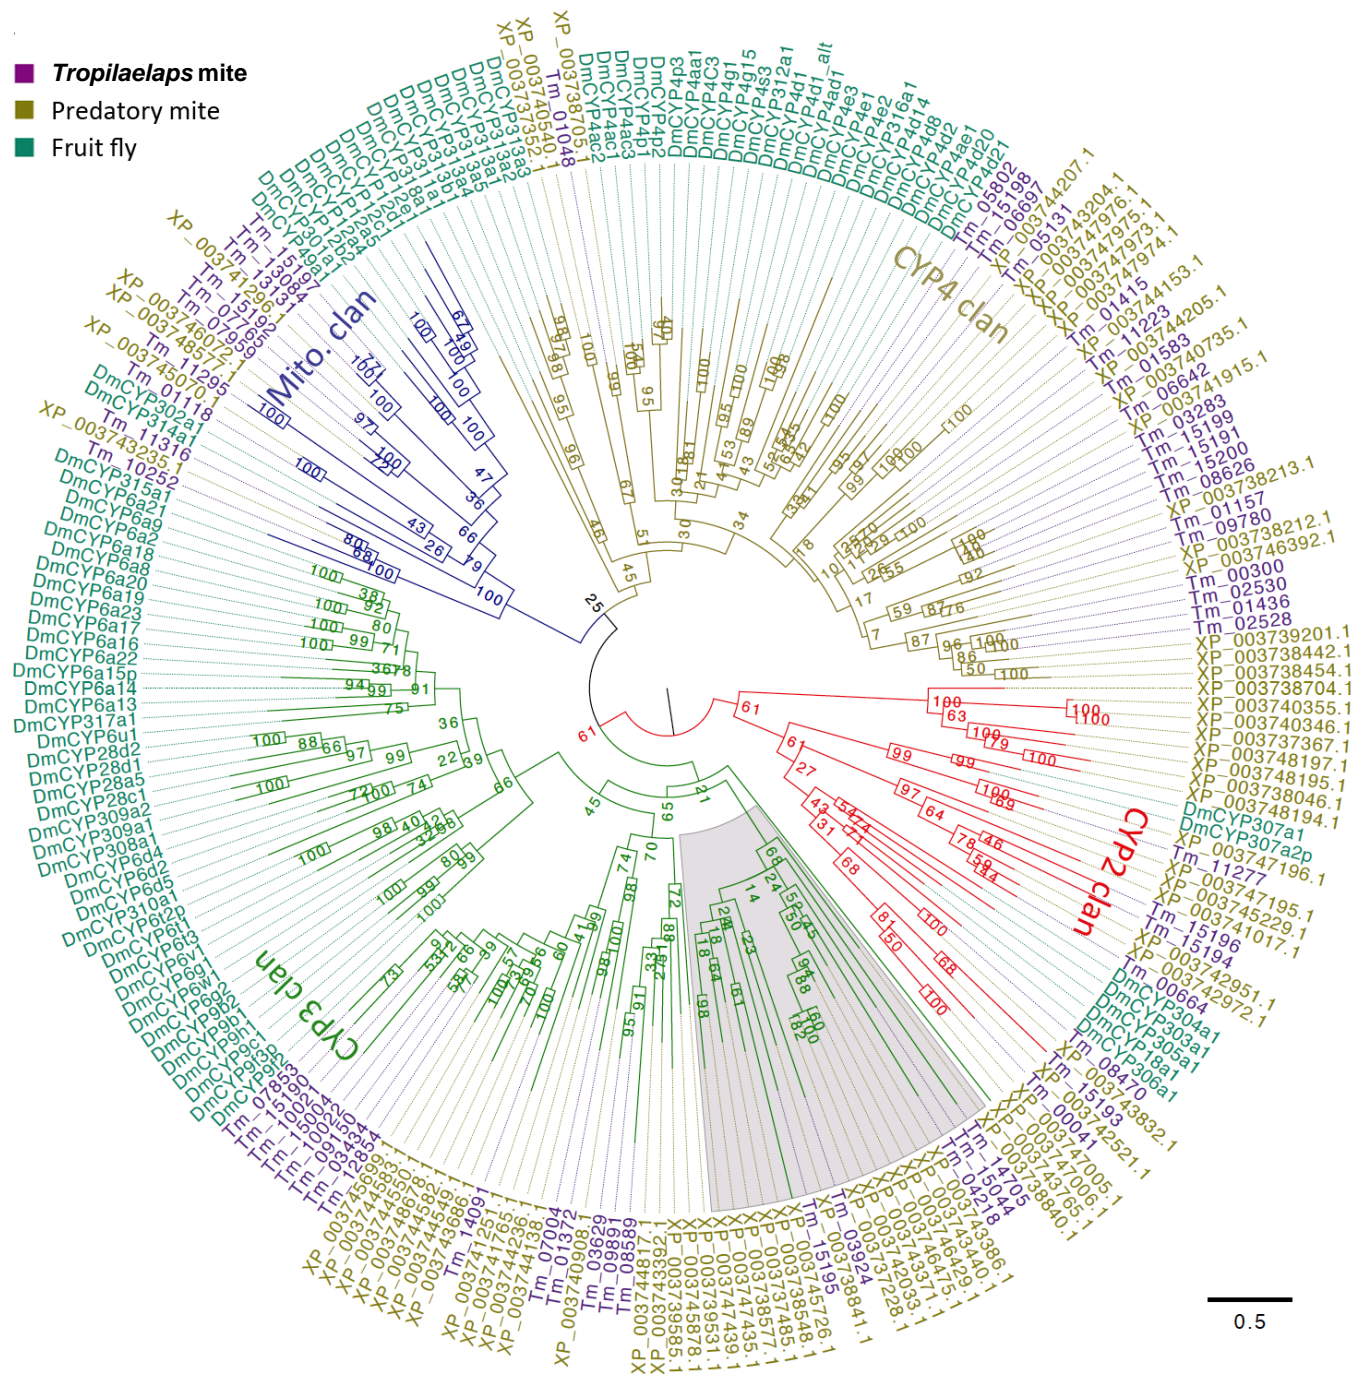

0.5



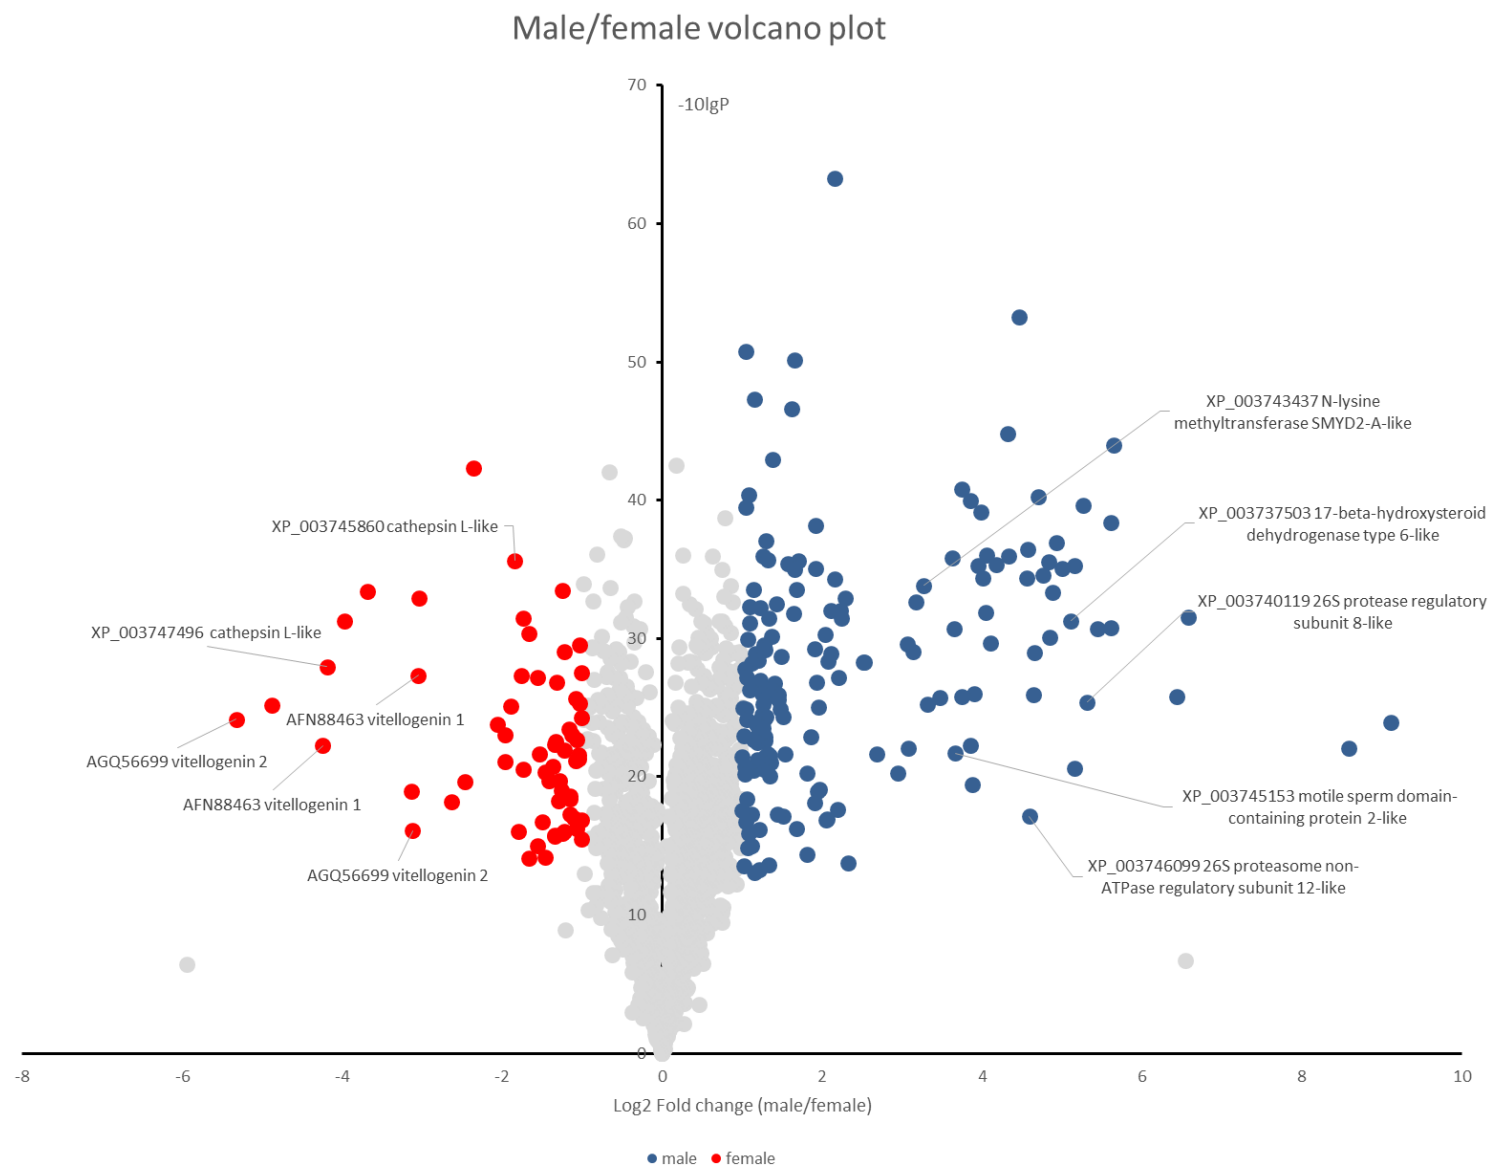

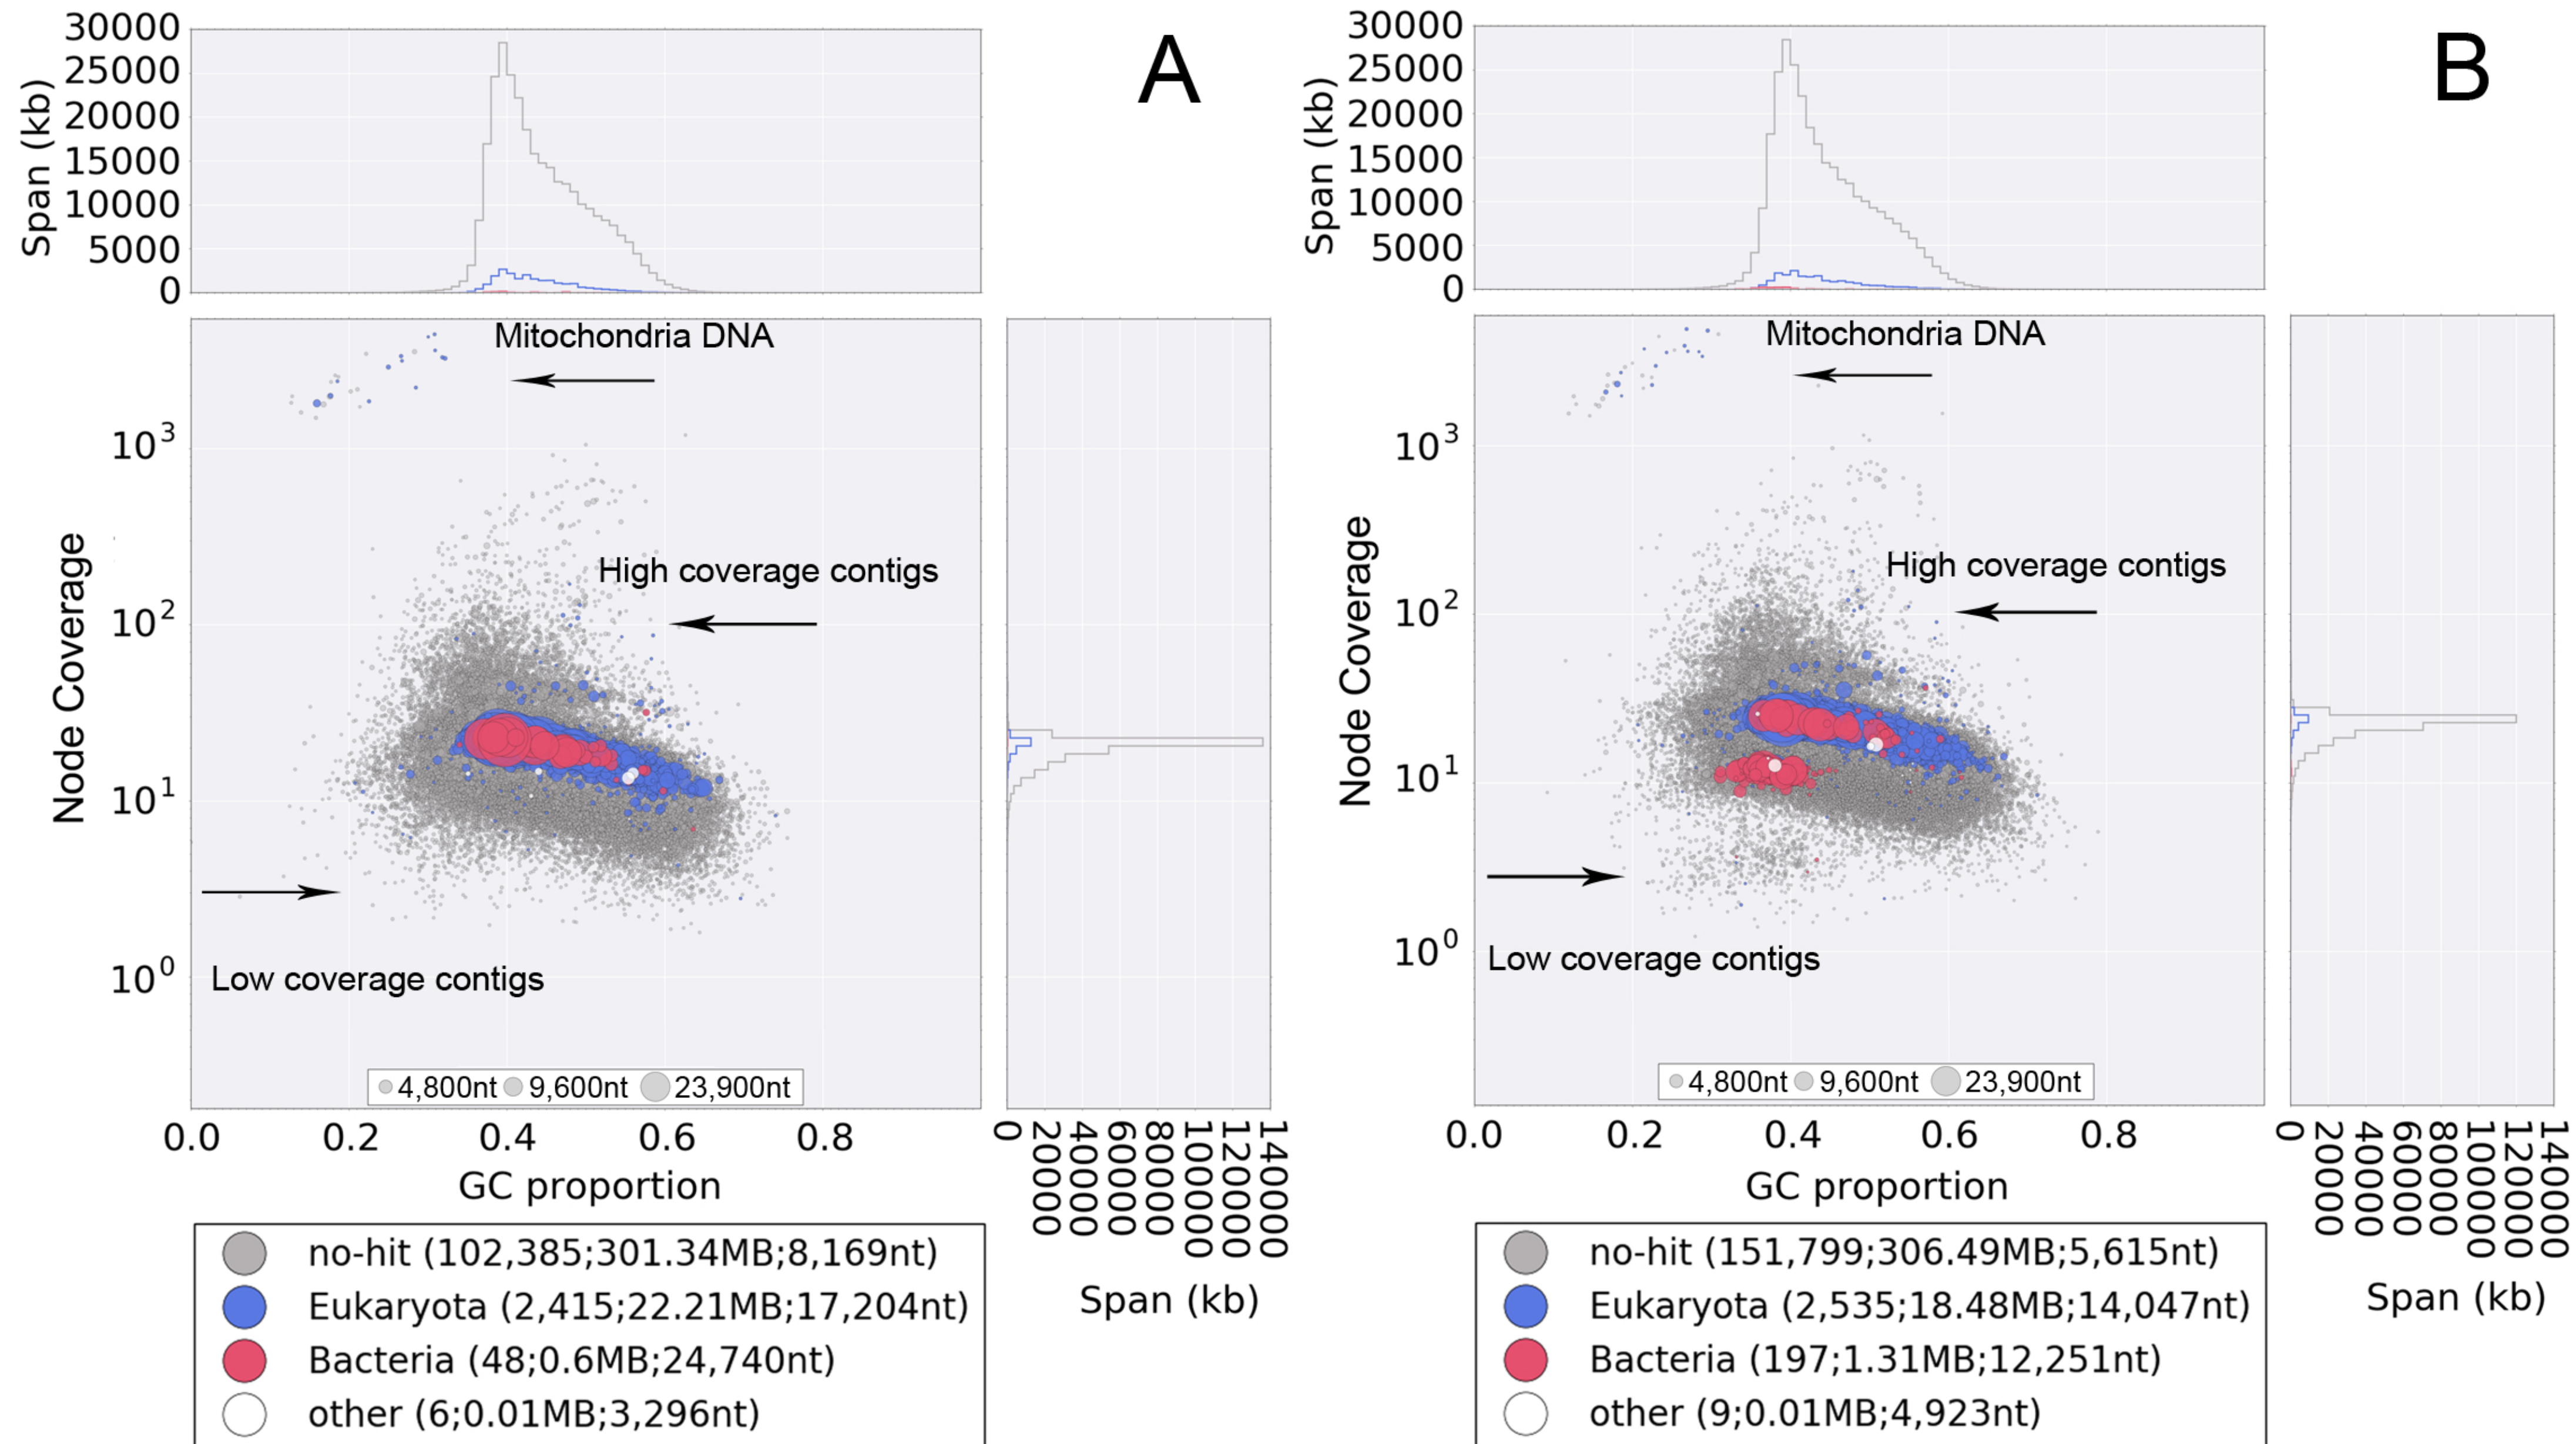

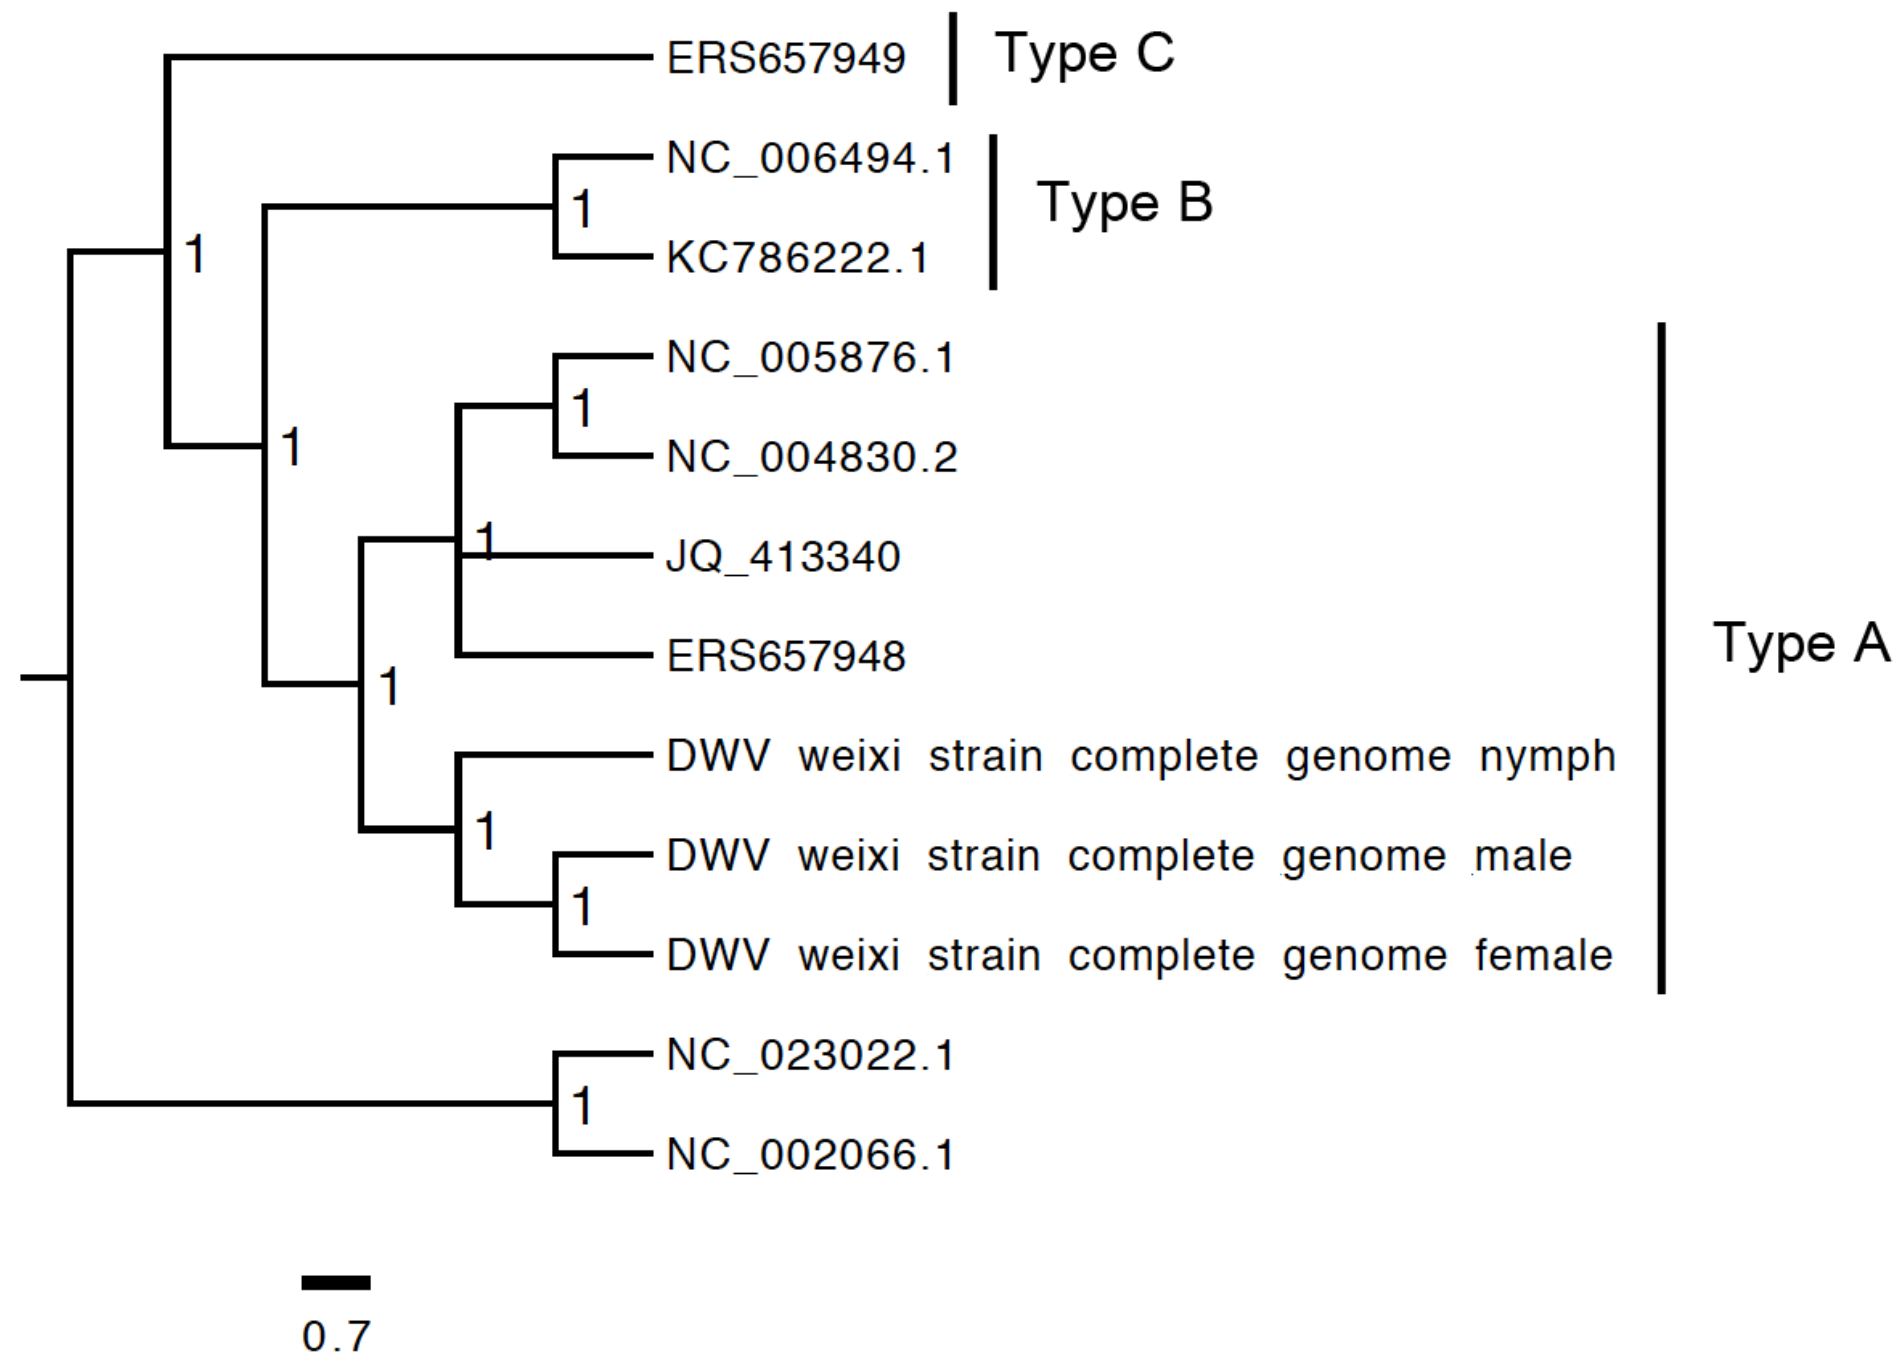

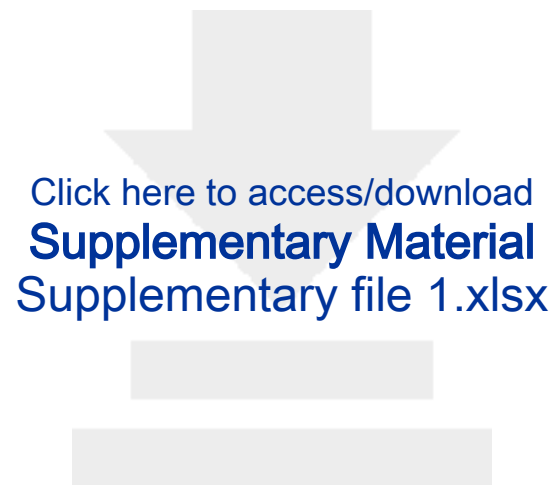

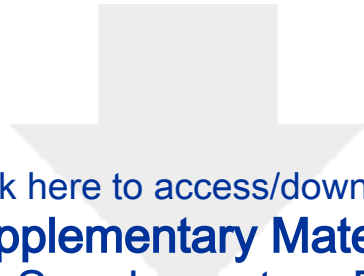

Click here to access/download  
**Supplementary Material**  
Dong et al\_Supplementary Figures.doc

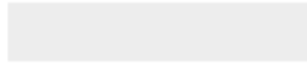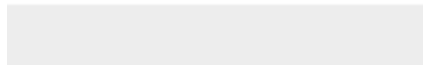

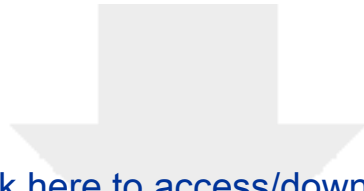

Click here to access/download  
**Supplementary Material**  
Dong et al\_Supplementary Tables.doc



Supplement: gix008_GIGA-D-16-00107_Revision_2.pdf [file gix008_GIGA-D-16-00107_Revision_2.pdf]
